# Supplementary material for: Pomacea canaliculata Ampullar Proteome: A Nematode-Based Bio-Pesticide Induces Changes in Metabolic and Stress-Related Pathways
Source: MDPI journal article supplement (doi:10.3390/biology10101049), 2021-10-15
Supplement: s1 [file s1]

**Table S2.** List of proteins exclusively identified in either AmpC or AmpN samples.

| Exclusively found in AmpC |                                                                           |
|---------------------------|---------------------------------------------------------------------------|
| Accession                 | Description                                                               |
| XP_025077978.1            | filamin-A-like isoform X3                                                 |
| XP_025095035.1            | myosin regulatory light chain LC-2, mantle muscle-like isoform X2         |
| XP_025096925.1            | alpha-crystallin B chain-like                                             |
| XP_025087032.1            | uncharacterized protein LOC112559814 isoform X3                           |
| XP_025087033.1            | thymosin beta-like isoform X4                                             |
| XP_025098389.1            | uncharacterized protein LOC112566423                                      |
| XP_025114047.1            | uncharacterized protein LOC112576040                                      |
| XP_025081568.1            | calcium-binding protein LPS1-beta-like                                    |
| XP_025088674.1            | prosaposin-like                                                           |
| XP_025080657.1            | uncharacterized protein LOC112556148                                      |
| XP_025109560.1            | LQP: 40S ribosomal protein S21-like                                       |
| XP_025097402.1            | tubulin polymerization-promoting protein family member 2-like             |
| XP_025111693.1            | collagen alpha-1(I) chain-like                                            |
| XP_025098586.1            | cystatin-B-like                                                           |
| XP_025088440.1            | uncharacterized protein LOC112560658 isoform X1                           |
| XP_025109837.1            | 2-iminobutanoate/2-iminopropanoate deaminase-like                         |
| XP_025090868.1            | glutathione peroxidase-like                                               |
| XP_025095897.1            | fucose mutarotase-like                                                    |
| XP_025087561.1            | uncharacterized protein LOC112560159 isoform X1                           |
| XP_025106405.1            | dystroglycan-like                                                         |
| XP_025086042.1            | Na(+)/H(+) exchange regulatory cofactor NHE-RF1-like isoform X1           |
| XP_025079223.1            | uncharacterized protein LOC112555178                                      |
| XP_025107147.1            | transforming growth factor-beta-induced protein ig-h3-like                |
| XP_025079302.1            | uncharacterized protein LOC112555220                                      |
| XP_025092851.1            | tumor protein D54-like isoform X1                                         |
| XP_025100206.1            | ATP synthase-coupling factor 6, mitochondrial-like                        |
| XP_025078861.1            | pollen-specific leucine-rich repeat extensin-like protein 1               |
| XP_025097582.1            | cathepsin L1-like                                                         |
| XP_025088165.1            | histone H3.v1-like                                                        |
| XP_025104532.1            | short-chain collagen C4-like                                              |
| XP_025093470.1            | dynactin subunit 2-like                                                   |
| XP_025113923.1            | fatty acid-binding protein, liver-like                                    |
| XP_025114330.1            | tubulin beta chain                                                        |
| XP_025083230.1            | LQP: melanotransferrin-like                                               |
| XP_025093782.1            | chitotriosidase-1-like                                                    |
| XP_025079812.1            | uncharacterized protein LOC112555596                                      |
| XP_025092057.1            | thioredoxin domain-containing protein 17-like                             |
| XP_025095124.1            | calmodulin-like                                                           |
| XP_025089653.1            | leupaxin-like isoform X1                                                  |
| XP_025088872.1            | complement component 1 Q subcomponent-binding protein, mitochondrial-like |
| XP_025104008.1            | titin homolog isoform X3                                                  |
| XP_025111818.1            | LQP: lysosomal alpha-mannosidase-like                                     |
| XP_025083732.1            | glycine, glutamate and proline-rich protein-like                          |

|                |                                                                                      |
|----------------|--------------------------------------------------------------------------------------|
| XP_025094607.1 | uncharacterized protein LOC112564180                                                 |
| XP_025090869.1 | ATPase inhibitor mai-2, mitochondrial-like isoform X1                                |
| XP_025082604.1 | basement membrane-specific heparan sulfate proteoglycan core protein-like isoform X5 |
| XP_025081479.1 | talin-1-like isoform X13                                                             |
| XP_025092885.1 | proprotein convertase subtilisin/kexin type 5-like                                   |
| XP_025091493.1 | extensin-like isoform X7                                                             |
| XP_025114843.1 | uncharacterized protein LOC112576527 isoform X11                                     |
| XP_025093891.1 | LQP: tubulin alpha-1A chain-like                                                     |
| XP_025091013.1 | collagen alpha-5(VI) chain-like isoform X1                                           |
| XP_025100362.1 | calmodulin, striated muscle-like isoform X2                                          |
| XP_025105683.1 | uncharacterized protein LOC112571088                                                 |
| XP_025079883.1 | collagen alpha-2(IV) chain-like                                                      |
| XP_025081440.1 | LIM and SH3 domain protein F42H10.3-like isoform X3                                  |
| XP_025079333.1 | calmodulin-like                                                                      |
| XP_025107571.1 | inter-alpha-trypsin inhibitor heavy chain H3-like                                    |
| XP_025106287.1 | dipeptidyl peptidase 1-like                                                          |
| XP_025079817.1 | LQP: uncharacterized protein LOC112555602                                            |
| XP_025116102.1 | calbindin-32-like isoform X1                                                         |
| XP_025079882.1 | collagen alpha-5(IV) chain-like                                                      |
| XP_025106308.1 | gelsolin-like protein 2 isoform X1                                                   |
| XP_025110417.1 | reticulocalbin-2-like                                                                |
| XP_025080910.1 | lipoma-preferred partner homolog                                                     |
| XP_025092566.1 | protein obstructor-E-like                                                            |
| XP_025086087.1 | uncharacterized protein LOC112559237 isoform X1                                      |
| XP_025101009.1 | uncharacterized protein LOC112568120 isoform X1                                      |
| XP_025096935.1 | whey acidic protein-like isoform X1                                                  |
| XP_025113591.1 | uncharacterized protein LOC112575783                                                 |
| XP_025110822.1 | glucosidase 2 subunit beta-like isoform X1                                           |
| XP_025111425.1 | nuclear autoantigenic sperm protein-like                                             |
| XP_025099450.1 | temptin-like isoform X1                                                              |
| XP_025113972.1 | uncharacterized protein LOC112575997                                                 |
| XP_025098500.1 | uncharacterized protein LOC112566496                                                 |
| XP_025099452.1 | temptin-like isoform X3                                                              |
| XP_025080338.1 | uncharacterized protein LOC112555941                                                 |
| XP_025079520.1 | LAMP family protein Imp-1-like                                                       |
| XP_025108426.1 | low-density lipoprotein receptor class A domain-containing protein 3-like            |
| XP_025096824.1 | SH3 domain-binding glutamic acid-rich protein homolog                                |
| XP_025114909.1 | programmed cell death protein 5-like                                                 |
| XP_025099231.1 | uncharacterized protein LOC112567014                                                 |
| XP_025077656.1 | cytochrome b-c1 complex subunit 6, mitochondrial-like                                |
| XP_025108739.1 | uncharacterized protein LOC112572951 isoform X1                                      |
| XP_025099105.1 | uncharacterized protein LOC112566898 isoform X1                                      |
| XP_025088922.1 | chitin-binding domain protein cbd-1-like                                             |
| XP_025081201.1 | ATP synthase subunit delta, mitochondrial-like                                       |
| XP_025087541.1 | myomodulin neuropeptides 1-like                                                      |
| XP_025091642.1 | C-type lectin domain family 4 member F-like                                          |
| XP_025081096.1 | uncharacterized protein LOC112556364 isoform X1                                      |

| XP_025085233.1                   | jupiter microtubule associated homolog 1-like                             |
|----------------------------------|---------------------------------------------------------------------------|
| XP_025095496.1                   | thioredoxin, mitochondrial-like                                           |
| XP_025080183.1                   | C-type mannose receptor 2-like                                            |
| XP_025083875.1                   | perlucin-like                                                             |
| XP_025108114.1                   | sortilin-related receptor-like                                            |
| XP_025091465.1                   | cathepsin B-like                                                          |
| XP_025077166.1                   | ubiquilin-1-like isoform X1                                               |
| XP_025091949.1                   | uncharacterized protein LOC112562719 isoform X1                           |
| XP_025110414.1                   | UV excision repair protein RAD23 homolog B-like                           |
| XP_025115296.1                   | nucleobindin-2-like isoform X1                                            |
| XP_025091078.1                   | calcium-regulated heat stable protein 1-like                              |
| XP_025097352.1                   | LQP: src substrate cortactin-like                                         |
| XP_025102573.1                   | very low-density lipoprotein receptor-like                                |
| XP_025113971.1                   | uncharacterized protein LOC112575996 isoform X2                           |
| XP_025088678.1                   | uncharacterized protein LOC112560828                                      |
| XP_025094190.1                   | death-associated protein 1-like                                           |
| XP_025106781.1                   | voltage-dependent calcium channel subunit alpha-2/delta-2-like isoform X1 |
| XP_025096696.1                   | insulin-like growth factor-binding protein-related protein 1              |
| XP_025094826.1                   | acyl-CoA-binding protein-like                                             |
| XP_025082802.1                   | formin-like protein 3                                                     |
| XP_025105588.1                   | endoglucanase-like                                                        |
| XP_025089735.1                   | proteasomal ubiquitin receptor ADRM1-like isoform X1                      |
| XP_025114839.1                   | uncharacterized protein LOC112576500 isoform X8                           |
| XP_025077341.1                   | tubulin-specific chaperone A-like                                         |
| XP_025079545.1                   | uncharacterized protein LOC112555390                                      |
| XP_025092033.1                   | uncharacterized protein LOC112562770 isoform X1                           |
| XP_025096197.1                   | uncharacterized protein LOC112565114                                      |
| XP_025082044.1                   | calexيتين-2-like                                                          |
| XP_025108516.1                   | uncharacterized protein LOC112572830                                      |
| <b>Exclusively found in AmpN</b> |                                                                           |
| <b>Accession</b>                 | <b>Description</b>                                                        |
| XP_025115938.1                   | tubulin beta-4B chain-like                                                |
| XP_025109819.1                   | tubulin alpha-2/alpha-4 chain                                             |
| XP_025086180.1                   | tubulin alpha-1A chain-like                                               |
| XP_025093240.1                   | tubulin alpha chain, testis-specific-like                                 |
| XP_025107285.1                   | tubulin alpha-8 chain-like                                                |
| XP_025114702.1                   | LQP: peptidyl-prolyl cis-trans isomerase B-like                           |
| XP_025099135.1                   | LQP: arginine kinase-like                                                 |
| XP_025112799.1                   | endoplasmic reticulum chaperone BiP                                       |
| XP_025081459.1                   | talin-1-like isoform X1                                                   |
| XP_025113391.1                   | LQP: spectrin alpha chain-like                                            |
| XP_025093356.1                   | ATP synthase subunit beta, mitochondrial-like                             |
| XP_025091015.1                   | collagen alpha-5(VI) chain-like isoform X2                                |
| XP_025076319.1                   | phosphoenolpyruvate carboxykinase [GTP]-like                              |
| XP_025080404.1                   | calumenin-B-like isoform X1                                               |
| XP_025078101.1                   | translation elongation factor 2-like                                      |
| XP_025080019.1                   | leukocyte elastase inhibitor-like                                         |

|                |                                                                                                   |
|----------------|---------------------------------------------------------------------------------------------------|
| XP_025104019.1 | coiled-coil domain-containing protein 141-like isoform X1                                         |
| XP_025076941.1 | ATP synthase subunit alpha, mitochondrial-like                                                    |
| XP_025106309.1 | gelsolin-like protein 2 isoform X2                                                                |
| XP_025095794.1 | LQP: 60 kDa heat shock protein, mitochondrial-like                                                |
| XP_025085337.1 | heat shock protein HSP 90-alpha-like isoform X1                                                   |
| XP_025107756.1 | endoplasmin-like                                                                                  |
| XP_025107717.1 | rab GDP dissociation inhibitor alpha-like                                                         |
| XP_025083164.1 | neprilysin-4-like                                                                                 |
| XP_025104607.1 | histone H3-like                                                                                   |
| XP_025089563.1 | clathrin heavy chain 1                                                                            |
| XP_025110182.1 | LQP: peroxidase-like                                                                              |
| XP_025092500.1 | LQP: galectin-4-like                                                                              |
| XP_025109457.1 | ADP,ATP carrier protein-like                                                                      |
| XP_025101259.1 | serine/threonine-protein phosphatase 2A 65 kDa regulatory subunit A alpha isoform-like isoform X1 |
| XP_025104976.1 | histone H2B, gonadal                                                                              |
| XP_025109714.1 | LQP: glycogen debranching enzyme-like                                                             |
| XP_025115912.1 | purine nucleoside phosphorylase-like                                                              |
| XP_025103811.1 | glycogen phosphorylase, muscle form-like                                                          |
| XP_025077535.1 | protein disulfide-isomerase A3-like                                                               |
| XP_025087821.1 | 1,4-alpha-glucan-branching enzyme-like isoform X1                                                 |
| XP_025081304.1 | glyoxylate reductase/hydroxypyruvate reductase-like isoform X1                                    |
| XP_025086690.1 | myophilin-like                                                                                    |
| XP_025081483.1 | uncharacterized protein LOC112556562                                                              |
| XP_025100353.1 | calmodulin, striated muscle-like isoform X1                                                       |
| XP_025082249.1 | glyoxylate reductase/hydroxypyruvate reductase-like                                               |
| XP_025080083.1 | retinal dehydrogenase 2-like                                                                      |
| XP_025106061.1 | LQP: UTP--glucose-1-phosphate uridylyltransferase-like                                            |
| XP_025087407.1 | phosphoglycerate kinase 1-like                                                                    |
| XP_025095713.1 | guanine nucleotide-binding protein subunit beta-2-like 1                                          |
| XP_025094983.1 | uncharacterized protein ZK1073.1-like isoform X1                                                  |
| XP_025088756.1 | LQP: carbonyl reductase [NADPH] 1-like                                                            |
| XP_025097225.1 | 40S ribosomal protein S4-like                                                                     |
| XP_025094855.1 | LQP: aspartate aminotransferase, cytoplasmic-like                                                 |
| XP_025115754.1 | aspartate aminotransferase, mitochondrial-like                                                    |
| XP_025088846.1 | hsc70-interacting protein-like isoform X1                                                         |
| XP_025109846.1 | 40S ribosomal protein S7-like                                                                     |
| XP_025112033.1 | LQP: retrograde protein of 51 kDa-like                                                            |
| XP_025089532.1 | 60S acidic ribosomal protein P0-like                                                              |
| XP_025098733.1 | chloride intracellular channel protein 4-like                                                     |
| XP_025090384.1 | mediator of RNA polymerase II transcription subunit 15-like isoform X1                            |
| XP_025079145.1 | eukaryotic initiation factor 4A-I-like isoform X1                                                 |
| XP_025082600.1 | basement membrane-specific heparan sulfate proteoglycan core protein-like isoform X1              |
| XP_025114842.1 | uncharacterized protein LOC112576527 isoform X10                                                  |
| XP_025083191.1 | peptidyl-prolyl cis-trans isomerase B-like isoform X1                                             |
| XP_025089867.1 | adenylyl cyclase-associated protein 1-like isoform X1                                             |
| XP_025085574.1 | 60S ribosomal protein L9-like                                                                     |

|                |                                                             |
|----------------|-------------------------------------------------------------|
| XP_025083177.1 | sorbitol dehydrogenase-like                                 |
| XP_025097457.1 | sorbitol dehydrogenase-like                                 |
| XP_025103728.1 | ras-related protein Rab-1A                                  |
| XP_025112474.1 | LQP: 40S ribosomal protein S5-like                          |
| XP_025080479.1 | 6-phosphogluconate dehydrogenase, decarboxylating-like      |
| XP_025092026.1 | protein disulfide-isomerase A6 homolog                      |
| XP_025105844.1 | LQP: saccharopine dehydrogenase-like oxidoreductase         |
| XP_025115350.1 | glucose-6-phosphate isomerase-like isoform X1               |
| XP_025085471.1 | troponin I-like isoform X1                                  |
| XP_025078437.1 | 40S ribosomal protein S6                                    |
| XP_025098343.1 | T-complex protein 1 subunit beta-like isoform X1            |
| XP_025089361.1 | isocitrate dehydrogenase [NADP], mitochondrial-like         |
| XP_025088246.1 | 40S ribosomal protein S13                                   |
| XP_025095375.1 | uncharacterized protein LOC112564634                        |
| XP_025112159.1 | cAMP-dependent protein kinase regulatory subunit isoform X1 |
| XP_025109348.1 | transitional endoplasmic reticulum ATPase                   |
| XP_025096543.1 | ADP-ribosylation factor 2 isoform X1                        |
| XP_025115033.1 | adenosylhomocysteinase-like                                 |
| XP_025106186.1 | 40S ribosomal protein SA-like                               |
| XP_025088066.1 | ubiquitin carboxyl-terminal hydrolase-like                  |
| XP_025105257.1 | uncharacterized protein LOC112570831                        |
| XP_025087575.1 | metalloproteinase inhibitor 3-like isoform X3               |
| XP_025081444.1 | 60S ribosomal protein L23                                   |
| XP_025096557.1 | citrate synthase, mitochondrial-like                        |
| XP_025106401.1 | uncharacterized protein LOC112571557 isoform X1             |
| XP_025110318.1 | 12 kDa FK506-binding protein-like                           |
| XP_025076712.1 | heterogeneous nuclear ribonucleoprotein 27C-like isoform X1 |
| XP_025081291.1 | arsenite methyltransferase-like                             |
| XP_025082245.1 | LQP: myosin heavy chain, non-muscle-like                    |
| XP_025098518.1 | stefin-C-like                                               |
| XP_025086814.1 | uncharacterized protein LOC112559692                        |
| XP_025102335.1 | uncharacterized protein LOC112568962 isoform X1             |
| XP_025113277.1 | 40S ribosomal protein S18                                   |
| XP_025086205.1 | nucleoside diphosphate kinase-like                          |
| XP_025086204.1 | 40S ribosomal protein S3                                    |
| XP_025107794.1 | ras-related protein Rap1                                    |
| XP_025093088.1 | 60S ribosomal protein L6-like                               |
| XP_025083894.1 | profilin-like                                               |
| XP_025088543.1 | uncharacterized protein LOC112560733                        |
| XP_025106310.1 | gelsolin-like protein 2                                     |
| XP_025086639.1 | LQP: protein lethal(2)essential for life-like               |
| XP_025091415.1 | 40S ribosomal protein S2                                    |
| XP_025108453.1 | ubiquitin-like modifier-activating enzyme 1                 |
| XP_025111655.1 | spliceosome RNA helicase DDX39B                             |
| XP_025105436.1 | calpain-B-like isoform X1                                   |
| XP_025085932.1 | plastin-1-like                                              |
| XP_025087916.1 | 40S ribosomal protein S3a                                   |

|                |                                                                               |
|----------------|-------------------------------------------------------------------------------|
| XP_025090773.1 | 60S ribosomal protein L23a-like isoform X1                                    |
| XP_025082063.1 | tropomodulin-like                                                             |
| XP_025104850.1 | elongation factor 1-gamma-like                                                |
| XP_025107162.1 | LQP: 60S ribosomal protein L3-like                                            |
| XP_025109085.1 | laminin subunit alpha-like                                                    |
| XP_025094847.1 | glycine--tRNA ligase-like                                                     |
| XP_025096773.1 | transaldolase-like isoform X1                                                 |
| XP_025112782.1 | 60S ribosomal protein L5-like                                                 |
| XP_025081510.1 | pyruvate kinase PKM-like isoform X1                                           |
| XP_025109667.1 | polypyrimidine tract-binding protein 2-like isoform X1                        |
| XP_025088080.1 | 60S ribosomal protein L32-like                                                |
| XP_025086455.1 | dihydropyrimidinase-like                                                      |
| XP_025106938.1 | mitochondrial-processing peptidase subunit beta-like                          |
| XP_025113992.1 | quinone oxidoreductase-like isoform X1                                        |
| XP_025085423.1 | 40S ribosomal protein S10-like                                                |
| XP_025090121.1 | 60S acidic ribosomal protein P1-like                                          |
| XP_025078139.1 | 60S ribosomal protein L17-like                                                |
| XP_025087593.1 | glycogen [starch] synthase-like                                               |
| XP_025092427.1 | flotillin-2-like                                                              |
| XP_025080098.1 | 60S ribosomal protein L8-like                                                 |
| XP_025105813.1 | ribosome-binding protein 1-like isoform X1                                    |
| XP_025081296.1 | proteasome subunit alpha type-2                                               |
| XP_025092955.1 | aconitate hydratase, mitochondrial-like                                       |
| XP_025103394.1 | probable methylmalonate-semialdehyde dehydrogenase [acylating], mitochondrial |
| XP_025100959.1 | uncharacterized protein LOC112568087                                          |
| XP_025112729.1 | uncharacterized protein LOC112575240                                          |
| XP_025107611.1 | laminin subunit beta-1-like                                                   |
| XP_025103993.1 | titin homolog isoform X1                                                      |
| XP_025087837.1 | 60S ribosomal protein L12-like                                                |
| XP_025116283.1 | uncharacterized protein LOC112577430 isoform X1                               |
| XP_025096378.1 | ras-like GTP-binding protein RHO                                              |
| XP_025091729.1 | 60S ribosomal protein L19-like                                                |
| XP_025096000.1 | 60S ribosomal protein L27-like                                                |
| XP_025112013.1 | 40S ribosomal protein S9                                                      |
| XP_025094074.1 | LQP: uncharacterized protein LOC112563873                                     |
| XP_025092020.1 | 60S ribosomal protein L7-like                                                 |
| XP_025087859.1 | LQP: BTB/POZ domain-containing protein KCTD12-like                            |
| XP_025103882.1 | histone H2A                                                                   |
| XP_025098510.1 | 40S ribosomal protein S15Aa                                                   |
| XP_025110976.1 | phosphoglucomutase-1-like                                                     |
| XP_025097167.1 | 60S ribosomal protein L24-like                                                |
| XP_025092850.1 | dolichyl-diphosphooligosaccharide--protein glycosyltransferase subunit 2-like |
| XP_025115104.1 | hemocyte protein-glutamine gamma-glutamyltransferase-like isoform X1          |
| XP_025107641.1 | universal stress protein A-like protein                                       |
| XP_025105795.1 | protein phosphatase 1B-like isoform X1                                        |
| XP_025093952.1 | uncharacterized protein LOC112563809                                          |
| XP_025097674.1 | peroxiredoxin-2-like                                                          |

|                          |                                                                               |
|--------------------------|-------------------------------------------------------------------------------|
| XP_025081438.1           | LIM and SH3 domain protein F42H10.3-like isoform X1                           |
| XP_025086082.1           | LQP: septin-11-like                                                           |
| XP_025083868.1           | heterogeneous nuclear ribonucleoprotein D-like                                |
| XP_025100558.1           | 40S ribosomal protein S19-like isoform X1                                     |
| XP_025097427.1           | beta-parvin-like                                                              |
| XP_025106346.1           | dolichyl-diphosphooligosaccharide--protein glycosyltransferase subunit 1-like |
| XP_025095580.1           | chitotriosidase-1-like isoform X1                                             |
| XP_025077177.1           | 60S ribosomal protein L4-like                                                 |
| XP_025085605.1           | annexin A7-like                                                               |
| XP_025090122.1           | 60S ribosomal protein L30-like                                                |
| XP_025076144.1           | beta-1,3-glucan-binding protein-like                                          |
| XP_025112876.1           | uncharacterized protein LOC112575323                                          |
| XP_025108539.1           | ankyrin-2-like isoform X1                                                     |
| XP_025081749.1           | guanine nucleotide-binding protein subunit beta isoform X2                    |
| XP_025082468.1           | LQP: 60S ribosomal protein L18-like                                           |
| XP_025096536.1           | ubiquitin-conjugating enzyme E2 2                                             |
| LQP= low quality protein |                                                                               |
