# Supplementary material for: Pomacea canaliculata Ampullar Proteome: A Nematode-Based Bio-Pesticide Induces Changes in Metabolic and Stress-Related Pathways
Source: MDPI journal article supplement (doi:10.3390/biology10101049), 2021-10-15
Supplement: s1 [file s1]

Table S1

| Accession      | Description                                                       | SCORE    |       |       |       |       |       |       | Num. of significant unique sequences |      |      |       |       |       |       | emPAI |       |       |       |       |
|----------------|-------------------------------------------------------------------|----------|-------|-------|-------|-------|-------|-------|--------------------------------------|------|------|-------|-------|-------|-------|-------|-------|-------|-------|-------|
|                |                                                                   | MW (kDa) | AmpA  | AmpB  | AmpC  | AmpNA | AmpNB | AmpNC | AmpA                                 | AmpB | AmpC | AmpNA | AmpNB | AmpNC | AmpA  | AmpB  | AmpC  | AmpNA | AmpNB | AmpNC |
| XP_025089564.1 | LQP: hemocyanin G-type, units Oda to Odg-like                     | 393,218  | 11247 | 11379 | 10939 | 21281 | 21961 | 21343 | 97                                   | 96   | 91   | 108   | 109   | 111   | 1,59  | 1,59  | 1,41  | 2,16  | 2,13  | 2,13  |
| XP_025089796.1 | hemocyanin G-type, units Oda to Odg-like                          | 392,973  | 10784 | 11259 | 11014 | 17786 | 18842 | 18784 | 104                                  | 100  | 93   | 112   | 111   | 110   | 1,77  | 1,68  | 1,44  | 2,16  | 2,13  | 2,19  |
| XP_025106444.1 | filamin-A-like isoform X1                                         | 280,77   | 4352  | 3951  | 3992  | 8507  | 8514  | 8628  | 62                                   | 57   | 57   | 103   | 96    | 102   | 1,14  | 0,99  | 1,02  | 2,66  | 2,31  | 2,65  |
| XP_025112424.1 | actin, adductor muscle                                            | 42,107   | 3918  | 3650  | 3964  | 5767  | 5761  | 5986  | 7                                    | 7    | 6    | 8     | 8     | 7     | 4,33  | 4,78  | 3,93  | 6,97  | 8,32  | 5,78  |
| XP_025110090.1 | actin, cytoplasmic                                                | 42,124   | 2076  | 2043  | 2204  | 3508  | 3425  | 3667  | 3                                    | 3    | 3    | 4     | 4     | 4     | 2,05  | 2,58  | 2,31  | 2,89  | 3,2   | 2,88  |
| XP_025110638.1 | LQP: myosin heavy chain, striated muscle-like                     | 226,077  | 148   | 135   | 120   | 4911  | 5194  | 4741  | 2                                    | 3    | 4    | 64    | 65    | 67    | 0,03  | 0,05  | 0,06  | 1,62  | 1,65  | 1,73  |
| XP_025089549.1 | cartilage matrix protein-like                                     | 48,649   | 4041  | 4422  | 4003  | 4392  | 4435  | 3909  | 15                                   | 16   | 16   | 14    | 14    | 16    | 2,72  | 3,57  | 2,72  | 2,73  | 2,98  | 3,58  |
| XP_025102035.1 | 15-hydroxyprostaglandin dehydrogenase [NAD(+)]-like               | 30,797   | 2772  | 2580  | 2539  | 4148  | 4118  | 4300  | 17                                   | 17   | 17   | 16    | 16    | 17    | 6,05  | 6,05  | 6,05  | 6,88  | 6,86  | 7,76  |
| XP_025077978.1 | filamin-A-like isoform X3                                         | 90,568   | 1261  | 1191  | 1231  | 0     | 0     | 0     | 27                                   | 26   | 26   | 0     | 0     | 0     | 1,84  | 1,74  | 1,64  | 0     | 0     | 0     |
| XP_025078481.1 | murinoglobulin-1-like isoform X8                                  | 184,938  | 3161  | 3190  | 2764  | 3416  | 3609  | 3385  | 46                                   | 45   | 42   | 47    | 51    | 44    | 1,41  | 1,28  | 1,2   | 1,51  | 1,69  | 1,28  |
| XP_025086366.1 | paramyosin-like isoform X1                                        | 102,022  | 660   | 579   | 458   | 3054  | 3073  | 3079  | 6                                    | 7    | 4    | 34    | 34    | 34    | 0,22  | 0,26  | 0,14  | 2,09  | 2,09  | 2,09  |
| XP_025115938.1 | tubulin beta-4B chain-like                                        | 50,189   | 0     | 0     | 0     | 2366  | 2357  | 2537  | 0                                    | 0    | 0    | 2     | 2     | 2     | 0     | 0     | 0     | 3,09  | 2,82  | 3,08  |
| XP_025109819.1 | tubulin alpha-2/alpha-4 chain                                     | 50,856   | 0     | 0     | 0     | 2408  | 2336  | 2276  | 0                                    | 0    | 0    | 2     | 2     | 2     | 0     | 0     | 0     | 2,08  | 2,29  | 2,08  |
| XP_025086180.1 | tubulin alpha-1A chain-like                                       | 50,746   | 0     | 0     | 0     | 2077  | 2029  | 1981  | 0                                    | 0    | 0    | 3     | 3     | 3     | 0     | 0     | 0     | 1,71  | 1,89  | 1,89  |
| XP_025093240.1 | tubulin alpha chain, testis-specific-like                         | 50,914   | 0     | 0     | 0     | 1821  | 1772  | 1681  | 0                                    | 0    | 0    | 4     | 4     | 3     | 0     | 0     | 0     | 1,88  | 2,07  | 1,69  |
| XP_025107285.1 | tubulin alpha-8 chain-like                                        | 51,485   | 0     | 0     | 0     | 1732  | 1706  | 1691  | 0                                    | 0    | 0    | 5     | 4     | 5     | 0     | 0     | 0     | 1,67  | 1,66  | 1,66  |
| XP_025093885.1 | LQP: uncharacterized protein LOC112563776                         | 149,309  | 727   | 910   | 863   | 2151  | 2101  | 2106  | 19                                   | 20   | 19   | 34    | 32    | 32    | 0,54  | 0,57  | 0,54  | 1,17  | 1,07  | 1,07  |
| XP_025103230.1 | calponin-1-like                                                   | 45,774   | 3404  | 3092  | 3152  | 2008  | 1924  | 1894  | 25                                   | 24   | 25   | 22    | 22    | 22    | 8,05  | 7,41  | 8,05  | 5,29  | 4,41  | 4,83  |
| XP_025083091.1 | enolase-like                                                      | 47,282   | 761   | 810   | 740   | 1997  | 2154  | 2187  | 17                                   | 18   | 16   | 20    | 20    | 20    | 2,59  | 2,86  | 2,35  | 3,46  | 3,45  | 3,45  |
| XP_025106551.1 | collagen alpha-3(VI) chain-like isoform X18                       | 286,004  | 941   | 777   | 571   | 1983  | 2064  | 2019  | 16                                   | 16   | 12   | 28    | 26    | 22    | 0,21  | 0,21  | 0,15  | 0,4   | 0,36  | 0,3   |
| XP_025106211.1 | glutamate receptor 1-like                                         | 56,36    | 346   | 291   | 298   | 1719  | 1909  | 1957  | 7                                    | 8    | 8    | 17    | 17    | 17    | 0,52  | 0,61  | 0,61  | 1,76  | 1,76  | 1,76  |
| XP_025082312.1 | glyceraldehyde-3-phosphate dehydrogenase-like isoform X1          | 39,33    | 1497  | 1468  | 1329  | 1714  | 1677  | 1676  | 12                                   | 12   | 13   | 15    | 14    | 15    | 1,78  | 1,78  | 2,03  | 2,6   | 2,3   | 2,59  |
| XP_025104758.1 | malate dehydrogenase, cytoplasmic-like                            | 36,887   | 539   | 593   | 473   | 1677  | 1563  | 1494  | 5                                    | 7    | 7    | 19    | 18    | 18    | 0,57  | 0,89  | 0,89  | 4,63  | 4,13  | 4,13  |
| XP_025087209.1 | transgelin-2-like                                                 | 18,649   | 1080  | 1133  | 937   | 1586  | 1749  | 1995  | 10                                   | 11   | 9    | 11    | 11    | 12    | 4,85  | 5,98  | 3,9   | 7,35  | 8,94  | 7,33  |
| XP_025114701.1 | peptidyl-prolyl cis-trans isomerase B-like                        | 23,806   | 1115  | 1079  | 978   | 1565  | 1663  | 1483  | 9                                    | 10   | 8    | 5     | 6     | 6     | 3,65  | 4,34  | 2,51  | 5,16  | 6,06  | 4,34  |
| XP_025114702.1 | LQP: peptidyl-prolyl cis-trans isomerase B-like                   | 23,999   | 0     | 0     | 0     | 1519  | 1618  | 1582  | 0                                    | 0    | 0    | 5     | 5     | 5     | 0     | 0     | 0     | 3     | 3,58  | 3,58  |
| XP_025087809.1 | vinculin-like isoform X1                                          | 121,601  | 409   | 385   | 426   | 1538  | 1360  | 1428  | 8                                    | 5    | 7    | 18    | 17    | 19    | 0,25  | 0,15  | 0,22  | 0,65  | 0,61  | 0,7   |
| XP_025099134.1 | LQP: arginine kinase-like                                         | 81,474   | 341   | 306   | 330   | 1509  | 1518  | 1562  | 5                                    | 4    | 4    | 8     | 8     | 8     | 0,39  | 0,28  | 0,28  | 0,79  | 0,79  | 0,86  |
| XP_025099135.1 | LQP: arginine kinase-like                                         | 140,972  | 204   | 0     | 0     | 995   | 900   | 999   | 2                                    | 0    | 0    | 4     | 4     | 4     | 0,13  | 0     | 0     | 0,27  | 0,27  | 0,3   |
| XP_025083839.1 | heat shock cognate 71 kDa protein                                 | 71,517   | 154   | 239   | 157   | 1479  | 1541  | 1444  | 4                                    | 6    | 2    | 18    | 17    | 18    | 0,27  | 0,39  | 0,15  | 1,83  | 1,69  | 1,82  |
| XP_025112799.1 | endoplasmic reticulum chaperone BiP                               | 74,114   | 0     | 0     | 0     | 1135  | 1244  | 1100  | 0                                    | 0    | 0    | 12    | 14    | 14    | 0     | 0     | 0     | 0,98  | 1,17  | 1,17  |
| XP_025099490.1 | heat shock protein 70 B2-like                                     | 70,414   | 101   | 128   | 146   | 566   | 685   | 531   | 2                                    | 2    | 2    | 4     | 6     | 5     | 0,15  | 0,15  | 0,15  | 0,27  | 0,4   | 0,33  |
| XP_025095035.1 | myosin regulatory light chain LC-2, mantle muscle-like isoform X2 | 19,236   | 3441  | 3342  | 3621  | 0     | 0     | 0     | 2                                    | 2    | 2    | 0     | 0     | 0     | 50,86 | 50,87 | 29,99 | 0     | 0     | 0     |
| XP_025103379.1 | alpha-actinin, sarcomeric-like isoform X1                         | 104,054  | 133   | 77    | 78    | 1327  | 1430  | 1476  | 2                                    | 2    | 3    | 27    | 27    | 22    | 0,07  | 0,07  | 0,1   | 1,41  | 1,41  | 1,05  |
| XP_025113955.1 | glutathione S-transferase 1-like                                  | 22,631   | 392   | 359   | 351   | 1317  | 1238  | 1397  | 4                                    | 5    | 4    | 6     | 6     | 7     | 1,78  | 2,22  | 1,78  | 4,8   | 4,79  | 5,7   |
| XP_025113405.1 | glutathione S-transferase S1-like                                 | 48,76    | 362   | 399   | 430   | 1038  | 941   | 1024  | 3                                    | 4    | 3    | 8     | 7     | 8     | 0,41  | 0,51  | 0,41  | 1,63  | 1,45  | 1,63  |
| XP_025098567.1 | myophilin-like                                                    | 19,402   | 1850  | 1662  | 1657  | 1310  | 1337  | 1416  | 11                                   | 10   | 10   | 12    | 10    | 11    | 11,76 | 6,67  | 9,77  | 8,11  | 5,47  | 6,67  |
| XP_025081459.1 | talin-1-like isoform X1                                           | 282,925  | 0     | 0     | 0     | 1296  | 1155  | 1281  | 0                                    | 0    | 0    | 32    | 32    | 36    | 0     | 0     | 0     | 0,47  | 0,47  | 0,54  |
| XP_025113391.1 | LQP: spectrin alpha chain-like                                    | 283,325  | 0     | 0     | 116   | 1261  | 1246  | 1377  | 0                                    | 0    | 2    | 34    | 38    | 38    | 0     | 0     | 0,02  | 0,5   | 0,58  | 0,58  |
| XP_025095804.1 | uncharacterized protein LOC112564910                              | 25,874   | 1076  | 1186  | 1150  | 1242  | 1300  | 1222  | 8                                    | 8    | 10   | 9     | 9     | 9     | 2,18  | 2,18  | 3,11  | 2,62  | 2,62  | 2,62  |
| XP_025114751.1 | synaptic vesicle membrane protein VAT-1 homolog-like              | 45,088   | 654   | 641   | 536   | 1234  | 1187  | 1079  | 15                                   | 14   | 12   | 16    | 18    | 18    | 2,06  | 1,84  | 1,44  | 2,3   | 2,82  | 2,82  |
| XP_025104956.1 | LQP: spectrin beta chain-like                                     | 282,322  | 258   | 225   | 177   | 1233  | 1186  | 868   | 5                                    | 6    | 4    | 31    | 34    | 26    | 0,06  | 0,07  | 0,05  | 0,45  | 0,51  | 0,37  |
| XP_025093356.1 | ATP synthase subunit beta, mitochondrial-like                     | 63,466   | 0     | 0     | 0     | 1117  | 923   | 936   | 0                                    | 0    | 0    | 17    | 15    | 14    | 0     | 0     | 0     | 1,47  | 1,22  | 1,1   |
| XP_025090809.1 | LQP: elongation factor 1-alpha-like                               | 50,341   | 102   | 79    | 0     | 1112  | 1086  | 1114  | 2                                    | 3    | 0    | 14    | 13    | 14    | 0,14  | 0,22  | 0     | 1,55  | 1,38  | 1,54  |
| XP_025094704.1 | protein disulfide-isomerase-like isoform X1                       | 56,331   | 372   | 406   | 361   | 1108  | 1358  | 1052  | 11                                   | 11   | 10   | 17    | 20    | 18    | 0,93  | 0,93  | 0,82  | 1,77  | 2,51  | 1,93  |
| XP_025093079.1 | 14-3-3 protein epsilon-like isoform X1                            | 38,999   | 0     | 455   | 445   | 1032  | 1068  | 1054  | 0                                    | 8    | 7    | 10    | 11    | 10    | 0     | 1,17  | 1,17  | 1,81  | 2,06  | 2,06  |
| XP_025090294.1 | 14-3-3 protein beta/alpha-A-like                                  | 29,423   | 99    | 82    | 138   | 315   | 312   | 356   | 2                                    | 2    | 3    | 7     | 6     | 7     | 0,57  | 0,4   | 0,76  | 1,78  | 1,48  | 2,11  |
| XP_025091015.1 | collagen alpha-5(VI) chain-like isoform X2                        | 49,616   | 0     | 522   | 0     | 969   | 1110  | 1068  | 0                                    | 9    | 0    | 13    | 13    | 13    | 0     | 0,84  | 0     | 1,42  | 1,41  | 1,41  |
| XP_025076319.1 | phosphoenolpyruvate carboxykinase [GTP]-like                      | 74,042   | 0     | 0     | 0     | 923   | 885   | 867   | 0                                    | 0    | 0    | 16    | 16    | 16    | 0     | 0     | 0     | 1,08  | 1,07  | 1,07  |
| XP_025080405.1 | calumenin-like isoform X2                                         | 37,646   | 2175  | 2471  | 2776  | 901   | 1003  | 1017  | 5                                    | 4    | 5    | 3     | 2     | 3     | 6,74  | 5,48  | 6,08  | 2,81  | 2,48  | 2,48  |

|                |                                                                                                |         |      |      |      |     |     |     |    |    |    |    |    |    |      |      |      |      |      |      |
|----------------|------------------------------------------------------------------------------------------------|---------|------|------|------|-----|-----|-----|----|----|----|----|----|----|------|------|------|------|------|------|
| XP_025080404.1 | calumenin-B-like isoform X1                                                                    | 38,56   | 0    | 0    | 2638 | 0   | 991 | 975 | 0  | 0  | 2  | 0  | 2  | 2  | 0    | 0    | 3,78 | 0    | 2,38 | 2,1  |
| XP_025078041.1 | LQP: collagen alpha-5(VI) chain-like                                                           | 45,287  | 574  | 574  | 462  | 892 | 702 | 734 | 14 | 10 | 9  | 13 | 11 | 11 | 1,82 | 1,1  | 0,95 | 1,63 | 1,26 | 1,26 |
| XP_025106720.1 | LQP: transketolase-like                                                                        | 68,647  | 239  | 122  | 118  | 828 | 733 | 509 | 6  | 4  | 2  | 16 | 14 | 14 | 0,34 | 0,22 | 0,1  | 1,31 | 1,09 | 1,09 |
| XP_025109080.1 | calreticulin-like                                                                              | 47,418  | 449  | 572  | 408  | 797 | 629 | 796 | 12 | 11 | 10 | 11 | 11 | 11 | 1,34 | 1,18 | 1,03 | 1,18 | 1,18 | 1,18 |
| XP_025078101.1 | translation elongation factor 2-like                                                           | 95,71   | 0    | 0    | 0    | 766 | 788 | 783 | 0  | 0  | 0  | 20 | 19 | 21 | 0    | 0    | 0    | 1,03 | 0,96 | 1,1  |
| XP_025099080.1 | alpha-crystallin A chain-like                                                                  | 19,893  | 1140 | 1265 | 1303 | 749 | 740 | 803 | 7  | 7  | 7  | 6  | 6  | 6  | 2,78 | 2,78 | 2,78 | 2,2  | 2,2  | 2,2  |
| XP_025096925.1 | alpha-crystallin B chain-like                                                                  | 19,016  | 246  | 339  | 234  | 0   | 0   | 92  | 3  | 4  | 4  | 0  | 0  | 2  | 1    | 1,38 | 1,38 | 0    | 0    | 0,68 |
| XP_025096926.1 | protein lethal(2)essential for life-like                                                       | 17,506  | 179  | 165  | 196  | 50  | 67  | 74  | 3  | 3  | 3  | 2  | 2  | 2  | 1,12 | 1,12 | 1,12 | 0,76 | 0,75 | 0,75 |
| XP_025077321.1 | LQP: thrombospondin type-1 domain-containing protein 4-like                                    | 89,636  | 1437 | 1076 | 1381 | 747 | 661 | 617 | 15 | 13 | 13 | 12 | 14 | 12 | 0,76 | 0,63 | 0,63 | 0,57 | 0,69 | 0,57 |
| XP_025111140.1 | far upstream element-binding protein 3-like                                                    | 19,317  | 1361 | 1153 | 1381 | 747 | 925 | 771 | 10 | 9  | 8  | 7  | 8  | 7  | 5,54 | 5,54 | 4,51 | 3,66 | 4,51 | 2,92 |
| XP_025110201.1 | LQP: uncharacterized protein LOC112573811                                                      | 68,834  | 137  | 120  | 77   | 728 | 703 | 491 | 4  | 4  | 4  | 8  | 8  | 8  | 0,22 | 0,22 | 0,22 | 0,48 | 0,48 | 0,48 |
| XP_025080024.1 | serine protease inhibitor 2.1-like isoform X1                                                  | 45,028  | 540  | 579  | 452  | 726 | 635 | 787 | 3  | 5  | 3  | 4  | 5  | 4  | 0,56 | 0,81 | 0,68 | 1,11 | 1,27 | 0,96 |
| XP_025080031.1 | serine protease inhibitor 2.1-like                                                             | 37,532  | 499  | 429  | 417  | 548 | 534 | 656 | 2  | 2  | 2  | 2  | 2  | 2  | 0,87 | 0,71 | 0,87 | 1,44 | 1,44 | 1,44 |
| XP_025080019.1 | leukocyte elastase inhibitor-like                                                              | 50,365  | 0    | 0    | 0    | 407 | 441 | 338 | 0  | 0  | 0  | 3  | 3  | 2  | 0    | 0    | 0    | 0,4  | 0,4  | 0,4  |
| XP_025104019.1 | coiled-coil domain-containing protein 141-like isoform X1                                      | 170,252 | 0    | 0    | 0    | 700 | 606 | 720 | 0  | 0  | 0  | 19 | 19 | 17 | 0    | 0    | 0    | 0,46 | 0,46 | 0,4  |
| XP_025079300.1 | myosin essential light chain, striated adductor muscle-like                                    | 17,705  | 667  | 690  | 748  | 694 | 707 | 576 | 10 | 10 | 10 | 9  | 9  | 9  | 5,37 | 5,37 | 5,37 | 4,3  | 5,37 | 5,37 |
| XP_025082558.1 | LQP: protein singed-like                                                                       | 56,229  | 178  | 264  | 243  | 664 | 583 | 341 | 6  | 5  | 5  | 15 | 13 | 10 | 0,43 | 0,35 | 0,35 | 1,77 | 1,31 | 0,82 |
| XP_025090599.1 | fructose-bisphosphate aldolase-like isoform X1                                                 | 46,254  | 349  | 234  | 162  | 640 | 634 | 680 | 5  | 4  | 4  | 6  | 6  | 7  | 0,66 | 0,34 | 0,34 | 0,92 | 0,92 | 0,66 |
| XP_025098992.1 | superoxide dismutase [Cu-Zn]-like                                                              | 15,772  | 1462 | 1551 | 1407 | 626 | 539 | 421 | 6  | 6  | 6  | 6  | 6  | 5  | 2,48 | 2,48 | 2,48 | 2,48 | 2,48 | 1,83 |
| XP_025076941.1 | ATP synthase subunit alpha, mitochondrial-like                                                 | 62,838  | 0    | 0    | 0    | 622 | 625 | 634 | 0  | 0  | 0  | 15 | 13 | 14 | 0    | 0    | 0    | 1,24 | 1,01 | 1,12 |
| XP_025106309.1 | gelsolin-like protein 2 isoform X2                                                             | 41,889  | 0    | 0    | 0    | 608 | 660 | 576 | 0  | 0  | 0  | 12 | 12 | 13 | 0    | 0    | 0    | 1,84 | 1,83 | 1,83 |
| XP_025095794.1 | LQP: 60 kDa heat shock protein, mitochondrial-like                                             | 62,81   | 0    | 126  | 0    | 601 | 533 | 511 | 0  | 2  | 0  | 10 | 10 | 10 | 0    | 0,11 | 0    | 0,71 | 0,71 | 0,71 |
| XP_025083507.1 | uncharacterized protein LOC112557719                                                           | 37,077  | 1151 | 1311 | 1305 | 590 | 578 | 486 | 10 | 9  | 10 | 9  | 8  | 7  | 1,7  | 1,25 | 1,7  | 1,26 | 1,25 | 0,88 |
| XP_025089044.1 | malate dehydrogenase, mitochondrial-like isoform X1                                            | 39,428  | 187  | 153  | 107  | 586 | 642 | 523 | 6  | 5  | 4  | 12 | 12 | 11 | 0,67 | 0,53 | 0,41 | 1,78 | 1,77 | 1,55 |
| XP_025086134.1 | hemicentin-2-like isoform X1                                                                   | 173,937 | 1822 | 1915 | 1838 | 586 | 542 | 588 | 30 | 29 | 26 | 15 | 14 | 17 | 0,79 | 0,79 | 0,66 | 0,34 | 0,31 | 0,39 |
| XP_025097192.1 | NADP-dependent malic enzyme-like                                                               | 67,178  | 536  | 548  | 437  | 572 | 552 | 495 | 11 | 10 | 8  | 11 | 9  | 10 | 0,74 | 0,65 | 0,49 | 0,74 | 0,57 | 0,65 |
| XP_025085337.1 | heat shock protein HSP 90-alpha-like isoform X1                                                | 80,052  | 0    | 0    | 0    | 568 | 606 | 656 | 0  | 0  | 0  | 13 | 11 | 13 | 0    | 0    | 0    | 0,81 | 0,66 | 0,81 |
| XP_025107756.1 | endoplasmin-like                                                                               | 90,638  | 0    | 0    | 0    | 443 | 375 | 463 | 0  | 0  | 0  | 8  | 8  | 9  | 0    | 0    | 0    | 0,4  | 0,4  | 0,45 |
| XP_025084779.1 | LQP: twitchin-like                                                                             | 523,956 | 604  | 600  | 602  | 525 | 516 | 629 | 19 | 22 | 14 | 16 | 16 | 22 | 0,13 | 0,15 | 0,1  | 0,11 | 0,11 | 0,15 |
| XP_025107717.1 | rab GDP dissociation inhibitor alpha-like                                                      | 51,802  | 0    | 0    | 0    | 525 | 609 | 706 | 0  | 0  | 0  | 14 | 12 | 13 | 0    | 0    | 0    | 1,48 | 1,18 | 1,32 |
| XP_025083164.1 | neprilysin-4-like                                                                              | 83,182  | 0    | 0    | 0    | 524 | 524 | 524 | 0  | 0  | 0  | 14 | 13 | 16 | 0    | 0    | 0    | 0,84 | 0,77 | 1    |
| XP_025108883.1 | peptidyl-prolyl cis-trans isomerase-like                                                       | 22,78   | 86   | 90   | 142  | 522 | 613 | 574 | 2  | 2  | 2  | 4  | 4  | 4  | 0,34 | 0,34 | 0,34 | 1,07 | 1,07 | 1,07 |
| XP_025104607.1 | histone H3-like                                                                                | 27,463  | 0    | 0    | 0    | 507 | 527 | 501 | 0  | 0  | 0  | 6  | 7  | 6  | 0    | 0    | 0    | 1,07 | 1,34 | 1,07 |
| XP_025113499.1 | PDZ and LIM domain protein 7-like isoform X1                                                   | 71,683  | 343  | 442  | 416  | 497 | 583 | 587 | 8  | 8  | 8  | 12 | 10 | 11 | 0,46 | 0,46 | 0,46 | 0,76 | 0,6  | 0,68 |
| XP_025089563.1 | clathrin heavy chain 1                                                                         | 193,968 | 0    | 0    | 0    | 496 | 383 | 352 | 0  | 0  | 0  | 10 | 10 | 8  | 0    | 0    | 0    | 0,19 | 0,19 | 0,15 |
| XP_025110182.1 | LQP: peroxidasin-like                                                                          | 153,735 | 0    | 0    | 0    | 495 | 516 | 464 | 0  | 0  | 0  | 15 | 14 | 13 | 0    | 0    | 0    | 0,39 | 0,36 | 0,33 |
| XP_025089511.1 | collagen alpha-6(VI) chain-like                                                                | 69,724  | 314  | 324  | 262  | 475 | 502 | 445 | 9  | 8  | 7  | 11 | 11 | 11 | 0,55 | 0,47 | 0,4  | 0,7  | 0,7  | 0,7  |
| XP_025086357.1 | troponin T, skeletal muscle-like isoform X3                                                    | 39,049  | 303  | 216  | 242  | 472 | 460 | 558 | 8  | 7  | 8  | 9  | 9  | 10 | 0,99 | 0,82 | 0,99 | 1,17 | 1,16 | 1,36 |
| XP_025098387.1 | catalase-like isoform X1                                                                       | 59,457  | 120  | 67   | 0    | 466 | 386 | 457 | 4  | 2  | 0  | 8  | 9  | 10 | 0,25 | 0,12 | 0    | 0,57 | 0,66 | 0,76 |
| XP_025092500.1 | LQP: galectin-4-like                                                                           | 64,718  | 0    | 0    | 0    | 454 | 370 | 339 | 0  | 0  | 0  | 10 | 8  | 7  | 0    | 0    | 0    | 0,68 | 0,52 | 0,44 |
| XP_025085843.1 | dihydropyrimidinase-like isoform X1                                                            | 72,895  | 354  | 306  | 352  | 446 | 488 | 407 | 2  | 2  | 2  | 10 | 8  | 9  | 0,1  | 0,1  | 0,1  | 0,59 | 0,45 | 0,52 |
| XP_025109457.1 | ADP,ATP carrier protein-like                                                                   | 34,722  | 0    | 0    | 0    | 444 | 394 | 316 | 0  | 0  | 0  | 9  | 7  | 8  | 0    | 0    | 0    | 1,38 | 0,96 | 1,16 |
| XP_025101259.1 | serine/threonine-protein phosphatase 2A 65 kDa regulatory subunit A alpha isoform-like isoform | 67,282  | 0    | 0    | 0    | 435 | 430 | 360 | 0  | 0  | 0  | 7  | 7  | 7  | 0    | 0    | 0    | 0,42 | 0,42 | 0,42 |
| XP_025084336.1 | uncharacterized protein LOC112558220                                                           | 10,169  | 1028 | 1113 | 1254 | 430 | 389 | 376 | 5  | 5  | 5  | 5  | 5  | 5  | 3,81 | 3,81 | 3,81 | 3,82 | 3,81 | 3,81 |
| XP_025107274.1 | LQP: glutathione S-transferase Mu 2-like                                                       | 25,021  | 193  | 145  | 124  | 423 | 476 | 430 | 3  | 2  | 2  | 8  | 7  | 7  | 0,49 | 0,3  | 0,3  | 1,9  | 1,54 | 1,54 |
| XP_025089430.1 | uncharacterized protein LOC112561269                                                           | 24,887  | 205  | 263  | 160  | 409 | 408 | 338 | 4  | 4  | 5  | 6  | 6  | 6  | 0,71 | 0,71 | 0,95 | 1,23 | 1,23 | 1,23 |
| XP_025107962.1 | uncharacterized protein LOC112572474                                                           | 24,79   | 578  | 599  | 576  | 400 | 377 | 460 | 4  | 4  | 4  | 3  | 3  | 3  | 0,71 | 0,71 | 0,71 | 0,5  | 0,5  | 0,5  |
| XP_025107262.1 | uncharacterized protein LOC112572003                                                           | 16,793  | 220  | 0    | 243  | 394 | 421 | 321 | 2  | 0  | 2  | 3  | 2  | 2  | 0,48 | 0    | 0,48 | 0,8  | 0,48 | 0,48 |
| XP_025080714.1 | thiamin pyrophosphokinase 1-like isoform X1                                                    | 30,609  | 261  | 183  | 231  | 391 | 332 | 367 | 6  | 5  | 6  | 6  | 6  | 5  | 0,92 | 0,72 | 0,92 | 0,92 | 0,92 | 0,72 |
| XP_025092669.1 | cartilage matrix protein-like                                                                  | 46,021  | 798  | 644  | 711  | 389 | 421 | 429 | 13 | 12 | 12 | 10 | 9  | 10 | 1,58 | 1,4  | 1,4  | 1,08 | 0,93 | 1,07 |
| XP_025087032.1 | uncharacterized protein LOC112559814 isoform X3                                                | 27,047  | 0    | 1263 | 1334 | 0   | 0   | 0   | 0  | 2  | 2  | 0  | 0  | 0  | 0    | 4,58 | 3,94 | 0    | 0    | 0    |
| XP_025087031.1 | thymosin beta-like isoform X2                                                                  | 27,005  | 1063 | 1011 | 1107 | 317 | 364 | 348 | 2  | 2  | 2  | 2  | 2  | 2  | 3,97 | 5,36 | 3,97 | 2,04 | 1,68 | 2,03 |

|                |                                                                                      |          |      |      |      |     |     |     |    |    |    |    |    |    |      |      |      |      |      |      |
|----------------|--------------------------------------------------------------------------------------|----------|------|------|------|-----|-----|-----|----|----|----|----|----|----|------|------|------|------|------|------|
| XP_025087033.1 | thymosin beta-like isoform X4                                                        | 22,481   | 742  | 748  | 742  | 0   | 0   | 0   | 2  | 2  | 2  | 0  | 0  | 0  | 4,04 | 5,76 | 4,04 | 0    | 0    | 0    |
| XP_025104976.1 | histone H2B, gonadal                                                                 | 13,46    | 0    | 90   | 0    | 366 | 428 | 421 | 0  | 2  | 0  | 3  | 4  | 3  | 0    | 0,62 | 0    | 1,07 | 1,64 | 1,07 |
| XP_025109714.1 | LQP: glycogen debranching enzyme-like                                                | 192,004  | 0    | 0    | 0    | 361 | 390 | 369 | 0  | 0  | 0  | 10 | 9  | 9  | 0    | 0    | 0    | 0,19 | 0,17 | 0,17 |
| XP_025115912.1 | purine nucleoside phosphorylase-like                                                 | 31,682   | 0    | 0    | 128  | 358 | 312 | 369 | 0  | 0  | 2  | 6  | 5  | 6  | 0    | 0    | 0,23 | 0,89 | 0,69 | 0,88 |
| XP_025078405.1 | microtubule-associated protein futsch-like isoform X1                                | 185,943  | 820  | 854  | 795  | 355 | 450 | 0   | 16 | 16 | 15 | 9  | 11 | 0  | 0,36 | 0,34 | 0,34 | 0,18 | 0,22 | 0    |
| XP_025078538.1 | voltage-dependent anion-selective channel protein 2-like                             | 30,26    | 86   | 52   | 0    | 355 | 312 | 293 | 2  | 2  | 0  | 5  | 5  | 4  | 0,25 | 0,25 | 0    | 0,74 | 0,73 | 0,55 |
| XP_025100514.1 | kinesin-like protein K39                                                             | 80,94    | 648  | 927  | 797  | 353 | 338 | 250 | 11 | 11 | 11 | 6  | 5  | 6  | 0,58 | 0,58 | 0,65 | 0,29 | 0,23 | 0,28 |
| XP_025082853.1 | uncharacterized protein LOC112557300                                                 | 11,229   | 1115 | 1063 | 1080 | 348 | 231 | 277 | 4  | 4  | 5  | 2  | 2  | 2  | 2,16 | 2,16 | 3,21 | 0,78 | 0,78 | 0,78 |
| XP_025103811.1 | glycogen phosphorylase, muscle form-like                                             | 97,71    | 0    | 0    | 0    | 343 | 356 | 285 | 0  | 0  | 0  | 9  | 9  | 7  | 0    | 0    | 0    | 0,37 | 0,37 | 0,27 |
| XP_025077535.1 | protein disulfide-isomerase A3-like                                                  | 62,564   | 0    | 0    | 0    | 336 | 357 | 356 | 0  | 0  | 0  | 5  | 8  | 7  | 0    | 0    | 0    | 0,31 | 0,54 | 0,46 |
| XP_025104157.1 | LQP: titin-like                                                                      | 1219,355 | 2328 | 2331 | 2218 | 333 | 605 | 597 | 46 | 42 | 40 | 11 | 16 | 12 | 0,14 | 0,12 | 0,12 | 0,03 | 0,05 | 0,03 |
| XP_025112526.1 | rho GDP-dissociation inhibitor 1-like                                                | 23,343   | 291  | 207  | 372  | 331 | 271 | 316 | 6  | 5  | 7  | 6  | 6  | 7  | 1,35 | 1,04 | 1,71 | 1,35 | 1,35 | 1,71 |
| XP_025087821.1 | 1,4-alpha-glucan-branching enzyme-like isoform X1                                    | 90,914   | 0    | 0    | 0    | 330 | 331 | 384 | 0  | 0  | 0  | 11 | 7  | 9  | 0    | 0    | 0    | 0,51 | 0,3  | 0,4  |
| XP_025081304.1 | glyoxylate reductase/hydroxypyruvate reductase-like isoform X1                       | 36,76    | 0    | 0    | 0    | 329 | 325 | 355 | 0  | 0  | 0  | 5  | 5  | 5  | 0    | 0    | 0    | 0,58 | 0,58 | 0,58 |
| XP_025087544.1 | small heat shock protein p36-like                                                    | 37,251   | 2231 | 2269 | 2148 | 326 | 344 | 304 | 22 | 22 | 21 | 9  | 11 | 10 | 6,88 | 6,88 | 6,2  | 1,25 | 1,68 | 1,45 |
| XP_025099800.1 | radixin-like                                                                         | 70,015   | 127  | 152  | 119  | 326 | 363 | 306 | 4  | 5  | 4  | 9  | 8  | 9  | 0,21 | 0,27 | 0,21 | 0,54 | 0,47 | 0,54 |
| XP_025085606.1 | uncharacterized protein LOC112559006                                                 | 212,918  | 2622 | 2638 | 2507 | 318 | 329 | 264 | 26 | 25 | 25 | 9  | 8  | 8  | 0,54 | 0,49 | 0,51 | 0,15 | 0,14 | 0,14 |
| XP_025091980.1 | reticulon-1-like isoform X1                                                          | 42,468   | 620  | 624  | 528  | 309 | 245 | 226 | 3  | 3  | 2  | 4  | 4  | 3  | 0,27 | 0,27 | 0,17 | 0,37 | 0,37 | 0,27 |
| XP_025089524.1 | collagen alpha-6(VI) chain-like                                                      | 126,544  | 142  | 102  | 142  | 309 | 326 | 354 | 4  | 3  | 4  | 8  | 9  | 9  | 0,11 | 0,08 | 0,11 | 0,24 | 0,27 | 0,27 |
| XP_025086690.1 | myophilin-like                                                                       | 23,143   | 0    | 0    | 0    | 308 | 213 | 205 | 0  | 0  | 0  | 3  | 4  | 4  | 0    | 0    | 0    | 0,54 | 0,78 | 0,78 |
| XP_025112685.1 | LIM domain-containing protein WLIM2b-like                                            | 9,086    | 440  | 393  | 425  | 299 | 240 | 302 | 5  | 5  | 7  | 4  | 4  | 4  | 4,76 | 4,76 | 10,6 | 3,06 | 3,06 | 3,06 |
| XP_025081483.1 | uncharacterized protein LOC112556562                                                 | 27,663   | 0    | 0    | 0    | 298 | 282 | 314 | 0  | 0  | 0  | 4  | 4  | 5  | 0    | 0    | 0    | 0,62 | 0,62 | 0,83 |
| XP_025100353.1 | calmodulin, striated muscle-like isoform X1                                          | 12,158   | 0    | 0    | 478  | 297 | 332 | 399 | 0  | 0  | 5  | 3  | 3  | 3  | 0    | 0    | 3,91 | 1,22 | 1,22 | 1,22 |
| XP_025082249.1 | glyoxylate reductase/hydroxypyruvate reductase-like                                  | 36,919   | 0    | 0    | 0    | 294 | 322 | 281 | 0  | 0  | 0  | 8  | 10 | 7  | 0    | 0    | 0    | 1,07 | 1,71 | 0,88 |
| XP_025080083.1 | retinal dehydrogenase 2-like                                                         | 54,365   | 83   | 0    | 0    | 293 | 324 | 346 | 2  | 0  | 0  | 10 | 8  | 8  | 0,13 | 0    | 0    | 0,86 | 0,64 | 0,64 |
| XP_025092049.1 | actin-depolymerizing factor 2-like                                                   | 17,168   | 211  | 266  | 234  | 293 | 256 | 166 | 5  | 6  | 5  | 5  | 4  | 4  | 1,6  | 2,14 | 1,6  | 1,6  | 1,15 | 1,15 |
| XP_025106061.1 | LQP: UTP-glucose-1-phosphate uridylyltransferase-like                                | 57,313   | 0    | 0    | 0    | 292 | 298 | 264 | 0  | 0  | 0  | 7  | 6  | 7  | 0    | 0    | 0    | 0,51 | 0,42 | 0,51 |
| XP_025081499.1 | eukaryotic translation initiation factor 5A-1-like isoform X1                        | 18,679   | 609  | 579  | 585  | 290 | 290 | 250 | 8  | 8  | 7  | 6  | 5  | 5  | 3,11 | 3,9  | 3,11 | 1,89 | 1,42 | 1,42 |
| XP_025094027.1 | uncharacterized protein LOC112563852 isoform X1                                      | 284,183  | 462  | 498  | 390  | 288 | 336 | 333 | 8  | 7  | 7  | 9  | 9  | 10 | 0,1  | 0,09 | 0,09 | 0,11 | 0,11 | 0,13 |
| XP_025087407.1 | phosphoglycerate kinase 1-like                                                       | 44,72    | 0    | 0    | 0    | 286 | 320 | 354 | 0  | 0  | 0  | 10 | 7  | 12 | 0    | 0    | 0    | 1,12 | 0,69 | 1,46 |
| XP_025105842.1 | enolase-phosphatase E1-like                                                          | 35,07    | 381  | 359  | 277  | 283 | 302 | 138 | 4  | 3  | 3  | 5  | 4  | 3  | 0,46 | 0,33 | 0,33 | 0,61 | 0,46 | 0,33 |
| XP_025095713.1 | guanine nucleotide-binding protein subunit beta-2-like 1                             | 36,029   | 0    | 0    | 0    | 282 | 146 | 164 | 0  | 0  | 0  | 4  | 3  | 3  | 0    | 0    | 0    | 0,45 | 0,32 | 0,32 |
| XP_025094983.1 | uncharacterized protein ZK1073.1-like isoform X1                                     | 42,892   | 0    | 0    | 0    | 279 | 196 | 230 | 0  | 0  | 0  | 6  | 6  | 6  | 0    | 0    | 0    | 0,6  | 0,6  | 0,6  |
| XP_025088756.1 | LQP: carbonyl reductase [NADPH] 1-like                                               | 30,197   | 0    | 0    | 0    | 277 | 232 | 218 | 0  | 0  | 0  | 7  | 6  | 7  | 0    | 0    | 0    | 1,17 | 0,94 | 1,17 |
| XP_025096983.1 | myophilin-like                                                                       | 21,965   | 122  | 97   | 125  | 274 | 273 | 290 | 3  | 4  | 4  | 6  | 4  | 3  | 0,57 | 0,83 | 0,83 | 1,47 | 0,83 | 0,57 |
| XP_025097225.1 | 40S ribosomal protein S4-like                                                        | 29,934   | 0    | 0    | 0    | 266 | 217 | 196 | 0  | 0  | 0  | 6  | 7  | 5  | 0    | 0    | 0    | 0,95 | 1,18 | 0,74 |
| XP_025092675.1 | 60S acidic ribosomal protein P2-like                                                 | 11,869   | 267  | 306  | 214  | 263 | 298 | 257 | 2  | 2  | 3  | 5  | 5  | 6  | 0,72 | 0,72 | 1,26 | 2,91 | 2,9  | 4,12 |
| XP_025094855.1 | LQP: aspartate aminotransferase, cytoplasmic-like                                    | 47,33    | 40   | 0    | 0    | 263 | 255 | 129 | 2  | 0  | 0  | 9  | 8  | 5  | 0,15 | 0    | 0    | 0,9  | 0,77 | 0,43 |
| XP_025115754.1 | aspartate aminotransferase, mitochondrial-like                                       | 47,84    | 0    | 0    | 0    | 113 | 159 | 58  | 0  | 0  | 0  | 4  | 3  | 3  | 0    | 0    | 0    | 0,32 | 0,23 | 0,23 |
| XP_025110989.1 | xylose isomerase-like                                                                | 51,235   | 52   | 72   | 31   | 262 | 193 | 222 | 2  | 2  | 2  | 7  | 6  | 4  | 0,14 | 0,14 | 0,14 | 0,58 | 0,48 | 0,3  |
| XP_025088846.1 | hsc70-interacting protein-like isoform X1                                            | 40,873   | 0    | 131  | 0    | 249 | 234 | 210 | 0  | 2  | 0  | 4  | 4  | 5  | 0    | 0,18 | 0    | 0,39 | 0,39 | 0,51 |
| XP_025082709.1 | SH3 domain-binding glutamic acid-rich-like protein 3                                 | 9,715    | 702  | 710  | 747  | 246 | 228 | 275 | 4  | 4  | 4  | 3  | 3  | 2  | 2,71 | 2,71 | 2,71 | 1,67 | 1,67 | 0,93 |
| XP_025109846.1 | 40S ribosomal protein S7-like                                                        | 22,413   | 0    | 0    | 0    | 238 | 132 | 150 | 0  | 0  | 0  | 6  | 4  | 5  | 0    | 0    | 0    | 1,43 | 0,81 | 1,09 |
| XP_025112033.1 | LQP: retrograde protein of 51 kDa-like                                               | 65,635   | 0    | 0    | 0    | 237 | 133 | 139 | 0  | 0  | 0  | 7  | 5  | 6  | 0    | 0    | 0    | 0,43 | 0,29 | 0,36 |
| XP_025089532.1 | 60S acidic ribosomal protein P0-like                                                 | 34,923   | 0    | 0    | 0    | 235 | 216 | 202 | 0  | 0  | 0  | 5  | 6  | 5  | 0    | 0    | 0    | 0,61 | 0,78 | 0,61 |
| XP_025098733.1 | chloride intracellular channel protein 4-like                                        | 34,533   | 0    | 0    | 0    | 159 | 241 | 176 | 0  | 0  | 0  | 4  | 4  | 4  | 0    | 0    | 0    | 0,79 | 0,79 | 0,97 |
| XP_025087966.1 | copper transport protein ATOX1-like                                                  | 7,922    | 611  | 614  | 689  | 231 | 236 | 208 | 3  | 3  | 3  | 2  | 2  | 2  | 2,32 | 2,32 | 2,32 | 1,23 | 1,23 | 1,23 |
| XP_025107348.1 | superoxide dismutase [Cu-Zn]-like                                                    | 25,462   | 81   | 102  | 63   | 230 | 192 | 143 | 2  | 2  | 2  | 2  | 2  | 2  | 0,3  | 0,3  | 0,3  | 0,3  | 0,3  | 0,3  |
| XP_025090384.1 | mediator of RNA polymerase II transcription subunit 15-like isoform X1               | 77,172   | 0    | 0    | 0    | 229 | 266 | 290 | 0  | 0  | 0  | 5  | 7  | 6  | 0    | 0    | 0    | 0,25 | 0,36 | 0,3  |
| XP_025079145.1 | eukaryotic initiation factor 4A-I-like isoform X1                                    | 53,893   | 0    | 0    | 0    | 229 | 281 | 193 | 0  | 0  | 0  | 5  | 6  | 6  | 0    | 0    | 0    | 0,37 | 0,45 | 0,45 |
| XP_025082600.1 | basement membrane-specific heparan sulfate proteoglycan core protein-like isoform X1 | 529,516  | 0    | 0    | 0    | 225 | 213 | 298 | 0  | 0  | 0  | 10 | 7  | 8  | 0    | 0    | 0    | 0,07 | 0,05 | 0,05 |
| XP_025085667.1 | lysosomal aspartic protease-like                                                     | 44,002   | 103  | 83   | 0    | 220 | 144 | 155 | 2  | 2  | 0  | 6  | 5  | 4  | 0,16 | 0,16 | 0    | 0,58 | 0,46 | 0,36 |

|                |                                                             |         |      |      |     |     |      |     |    |    |    |    |    |   |      |      |      |      |      |      |
|----------------|-------------------------------------------------------------|---------|------|------|-----|-----|------|-----|----|----|----|----|----|---|------|------|------|------|------|------|
| XP_025104087.1 | titin-like isoform X1                                       | 118,168 | 1048 | 1050 | 888 | 220 | 182  | 192 | 14 | 15 | 11 | 4  | 3  | 3 | 0,49 | 0,54 | 0,37 | 0,12 | 0,09 | 0,09 |
| XP_025114842.1 | uncharacterized protein LOC112576527 isoform X10            | 37,345  | 0    | 0    | 0   | 219 | 210  | 250 | 0  | 0  | 0  | 5  | 4  | 4 | 0    | 0    | 0    | 0,57 | 0,43 | 0,43 |
| XP_025083191.1 | peptidyl-prolyl cis-trans isomerase B-like isoform X1       | 26,823  | 0    | 0    | 0   | 214 | 171  | 164 | 0  | 0  | 0  | 6  | 5  | 5 | 0    | 0    | 0    | 1,1  | 0,86 | 0,86 |
| XP_025078628.1 | LQP: neurofilament medium polypeptide-like                  | 27,776  | 80   | 101  | 72  | 214 | 215  | 168 | 2  | 2  | 2  | 4  | 5  | 3 | 0,27 | 0,27 | 0,27 | 0,62 | 0,82 | 0,43 |
| XP_025089867.1 | adenyllyl cyclase-associated protein 1-like isoform X1      | 57,322  | 0    | 0    | 0   | 213 | 155  | 129 | 0  | 0  | 0  | 11 | 7  | 7 | 0    | 0    | 0    | 0,91 | 0,51 | 0,51 |
| XP_025106788.1 | uncharacterized protein LOC112571747                        | 17,699  | 127  | 179  | 86  | 212 | 159  | 135 | 3  | 3  | 2  | 4  | 2  | 2 | 0,75 | 0,75 | 0,45 | 1,11 | 0,45 | 0,45 |
| XP_025109789.1 | transforming growth factor-beta-induced protein ig-h3-like  | 86,247  | 259  | 273  | 224 | 211 | 175  | 139 | 7  | 5  | 4  | 3  | 2  | 2 | 0,32 | 0,22 | 0,17 | 0,12 | 0,08 | 0,08 |
| XP_025085574.1 | 60S ribosomal protein L9-like                               | 21,396  | 0    | 0    | 0   | 208 | 159  | 162 | 0  | 0  | 0  | 3  | 3  | 2 | 0    | 0    | 0    | 0,59 | 0,59 | 0,36 |
| XP_025083177.1 | sorbitol dehydrogenase-like                                 | 37,996  | 0    | 0    | 0   | 207 | 179  | 111 | 0  | 0  | 0  | 6  | 5  | 5 | 0    | 0    | 0    | 0,86 | 0,7  | 0,55 |
| XP_025097457.1 | sorbitol dehydrogenase-like                                 | 37,818  | 0    | 0    | 0   | 62  | 104  | 0   | 0  | 0  | 0  | 2  | 2  | 0 | 0    | 0    | 0    | 0,3  | 0,3  | 0    |
| XP_025103728.1 | ras-related protein Rab-1A                                  | 23,017  | 0    | 0    | 0   | 207 | 165  | 117 | 0  | 0  | 0  | 3  | 3  | 2 | 0    | 0    | 0    | 1,06 | 1,06 | 0,78 |
| XP_025112474.1 | LQP: 40S ribosomal protein S5-like                          | 23,437  | 0    | 0    | 0   | 207 | 204  | 210 | 0  | 0  | 0  | 3  | 3  | 3 | 0    | 0    | 0    | 0,53 | 0,53 | 0,53 |
| XP_025096878.1 | uncharacterized protein LOC112565575 isoform X1             | 270,574 | 949  | 807  | 889 | 207 | 190  | 206 | 11 | 11 | 11 | 6  | 3  | 4 | 0,16 | 0,16 | 0,15 | 0,08 | 0,04 | 0,05 |
| XP_025080479.1 | 6-phosphogluconate dehydrogenase, decarboxylating-like      | 53,107  | 0    | 0    | 0   | 207 | 186  | 149 | 0  | 0  | 0  | 4  | 3  | 3 | 0    | 0    | 0    | 0,29 | 0,21 | 0,21 |
| XP_025092026.1 | protein disulfide-isomerase A6 homolog                      | 48,288  | 0    | 0    | 0   | 205 | 194  | 205 | 0  | 0  | 0  | 3  | 3  | 2 | 0    | 0    | 0    | 0,23 | 0,23 | 0,15 |
| XP_025105844.1 | LQP: saccharopine dehydrogenase-like oxidoreductase         | 47,947  | 0    | 0    | 0   | 203 | 186  | 200 | 0  | 0  | 0  | 4  | 4  | 5 | 0    | 0    | 0    | 0,32 | 0,32 | 0,42 |
| XP_025115350.1 | glucose-6-phosphate isomerase-like isoform X1               | 67,687  | 0    | 0    | 0   | 197 | 174  | 128 | 0  | 0  | 0  | 5  | 5  | 4 | 0    | 0    | 0    | 0,28 | 0,28 | 0,22 |
| XP_025085471.1 | troponin I-like isoform X1                                  | 45,356  | 0    | 0    | 0   | 194 | 184  | 202 | 0  | 0  | 0  | 6  | 5  | 5 | 0    | 0    | 0    | 0,56 | 0,45 | 0,45 |
| XP_025078437.1 | 40S ribosomal protein S6                                    | 28,562  | 0    | 0    | 0   | 191 | 181  | 180 | 0  | 0  | 0  | 4  | 3  | 4 | 0    | 0    | 0    | 0,6  | 0,42 | 0,6  |
| XP_025098343.1 | T-complex protein 1 subunit beta-like isoform X1            | 58,366  | 0    | 0    | 0   | 191 | 169  | 154 | 0  | 0  | 0  | 2  | 2  | 2 | 0    | 0    | 0    | 0,12 | 0,12 | 0,12 |
| XP_025082706.1 | protein/nucleic acid deglycase DJ-1-like                    | 19,525  | 78   | 67   | 54  | 191 | 181  | 153 | 2  | 2  | 2  | 5  | 5  | 6 | 0,4  | 0,4  | 0,4  | 1,33 | 1,33 | 1,75 |
| XP_025089361.1 | isocitrate dehydrogenase [NADP], mitochondrial-like         | 51,216  | 0    | 0    | 0   | 189 | 187  | 177 | 0  | 0  | 0  | 4  | 5  | 5 | 0    | 0    | 0    | 0,3  | 0,39 | 0,39 |
| XP_025088246.1 | 40S ribosomal protein S13                                   | 17,21   | 0    | 0    | 0   | 188 | 198  | 173 | 0  | 0  | 0  | 4  | 4  | 4 | 0    | 0    | 0    | 1,15 | 1,15 | 1,15 |
| XP_025089277.1 | cofilin-like                                                | 17,015  | 139  | 159  | 148 | 188 | 168  | 248 | 2  | 2  | 2  | 3  | 2  | 3 | 0,47 | 0,47 | 0,47 | 0,79 | 0,47 | 0,79 |
| XP_025098601.1 | troponin C-like isoform X1                                  | 17,508  | 741  | 800  | 648 | 187 | 204  | 202 | 8  | 7  | 7  | 3  | 4  | 4 | 3,48 | 2,71 | 2,71 | 0,76 | 1,12 | 1,12 |
| XP_025095375.1 | uncharacterized protein LOC112564634                        | 43,121  | 0    | 0    | 0   | 186 | 152  | 143 | 0  | 0  | 0  | 4  | 4  | 4 | 0    | 0    | 0    | 0,37 | 0,37 | 0,37 |
| XP_025106684.1 | uncharacterized protein LOC112571691                        | 18,724  | 203  | 150  | 155 | 185 | 192  | 149 | 5  | 5  | 4  | 4  | 4  | 3 | 1,41 | 1,41 | 1,02 | 1,02 | 1,02 | 0,69 |
| XP_025090849.1 | vegetative incompatibility protein HET-E-1-like             | 45,553  | 121  | 75   | 72  | 183 | 146  | 131 | 4  | 3  | 2  | 6  | 6  | 6 | 0,34 | 0,25 | 0,16 | 0,56 | 0,56 | 0,56 |
| XP_025112159.1 | cAMP-dependent protein kinase regulatory subunit isoform X1 | 47,823  | 0    | 0    | 0   | 180 | 169  | 230 | 0  | 0  | 0  | 5  | 4  | 4 | 0    | 0    | 0    | 0,42 | 0,32 | 0,32 |
| XP_025104082.1 | barrier-to-autointegration factor-like                      | 10,537  | 292  | 294  | 241 | 180 | 165  | 156 | 2  | 2  | 2  | 2  | 2  | 2 | 0,84 | 0,84 | 0,84 | 0,84 | 0,84 | 0,84 |
| XP_025109348.1 | transitional endoplasmic reticulum ATPase                   | 89,731  | 0    | 0    | 0   | 178 | 225  | 148 | 0  | 0  | 0  | 3  | 6  | 3 | 0    | 0    | 0    | 0,12 | 0,25 | 0,12 |
| XP_025093398.1 | actin-interacting protein 1-like                            | 66,487  | 141  | 140  | 93  | 171 | 187  | 147 | 4  | 4  | 2  | 7  | 8  | 9 | 0,22 | 0,22 | 0,11 | 0,43 | 0,5  | 0,58 |
| XP_025096543.1 | ADP-ribosylation factor 2 isoform X1                        | 21,162  | 0    | 0    | 0   | 170 | 151  | 179 | 0  | 0  | 0  | 4  | 3  | 4 | 0    | 0    | 0    | 0,87 | 0,6  | 0,87 |
| XP_025095112.1 | elongation factor 1-beta-like                               | 23,503  | 149  | 152  | 105 | 170 | 135  | 179 | 2  | 2  | 2  | 5  | 3  | 4 | 0,33 | 0,33 | 0,33 | 1,02 | 0,53 | 0,76 |
| XP_025082954.1 | uncharacterized protein LOC112557363                        | 9,312   | 413  | 404  | 388 | 169 | 193  | 0   | 4  | 3  | 3  | 3  | 3  | 0 | 4,54 | 1,79 | 1,79 | 1,79 | 1,79 | 0    |
| XP_025115033.1 | adenosylhomocysteinase-like                                 | 48,265  | 0    | 0    | 0   | 168 | 267  | 210 | 0  | 0  | 0  | 6  | 8  | 6 | 0    | 0    | 0    | 0,52 | 0,74 | 0,52 |
| XP_025106186.1 | 40S ribosomal protein SA-like                               | 33,683  | 0    | 0    | 0   | 167 | 185  | 262 | 0  | 0  | 0  | 3  | 4  | 4 | 0    | 0    | 0    | 0,35 | 0,49 | 0,49 |
| XP_025088066.1 | ubiquitin carboxyl-terminal hydrolase-like                  | 25,395  | 0    | 0    | 0   | 166 | 100  | 0   | 0  | 0  | 0  | 2  | 2  | 0 | 0    | 0    | 0    | 0,3  | 0,3  | 0    |
| XP_025077458.1 | LQP: fibrillin-2-like                                       | 333,923 | 0    | 99   | 77  | 166 | 1150 | 144 | 0  | 2  | 2  | 5  | 29 | 4 | 0    | 0,02 | 0,02 | 0,05 | 0,37 | 0,04 |
| XP_025105257.1 | uncharacterized protein LOC112570831                        | 56,499  | 0    | 0    | 0   | 165 | 188  | 139 | 0  | 0  | 0  | 5  | 5  | 3 | 0    | 0    | 0    | 0,35 | 0,35 | 0,2  |
| XP_025081260.1 | collagen alpha-1(I) chain-like                              | 139,772 | 694  | 650  | 740 | 162 | 155  | 166 | 7  | 7  | 8  | 2  | 2  | 3 | 0,18 | 0,18 | 0,21 | 0,05 | 0,05 | 0,08 |
| XP_025087575.1 | metalloproteinase inhibitor 3-like isoform X3               | 18,289  | 0    | 0    | 0   | 161 | 0    | 143 | 0  | 0  | 0  | 2  | 0  | 2 | 0    | 0    | 0    | 0,43 | 0    | 0,43 |
| XP_025081444.1 | 60S ribosomal protein L23                                   | 14,741  | 0    | 0    | 0   | 157 | 187  | 185 | 0  | 0  | 0  | 2  | 2  | 2 | 0    | 0    | 0    | 0,56 | 0,56 | 0,56 |
| XP_025099638.1 | ganglioside GM2 activator-like                              | 22,163  | 313  | 330  | 294 | 156 | 81   | 107 | 3  | 3  | 3  | 3  | 3  | 3 | 0,56 | 0,56 | 0,56 | 0,57 | 0,56 | 0,56 |
| XP_025096557.1 | citrate synthase, mitochondrial-like                        | 52,319  | 0    | 0    | 0   | 155 | 83   | 105 | 0  | 0  | 0  | 3  | 2  | 2 | 0    | 0    | 0    | 0,21 | 0,14 | 0,14 |
| XP_025106401.1 | uncharacterized protein LOC112571557 isoform X1             | 21,595  | 0    | 0    | 0   | 154 | 79   | 54  | 0  | 0  | 0  | 2  | 2  | 2 | 0    | 0    | 0    | 0,36 | 0,36 | 0,36 |
| XP_025098389.1 | uncharacterized protein LOC112566423                        | 16,591  | 240  | 256  | 258 | 0   | 0    | 0   | 2  | 2  | 2  | 0  | 0  | 0 | 0,49 | 0,49 | 0,49 | 0    | 0    | 0    |
| XP_025110318.1 | 12 kDa FK506-binding protein-like                           | 12,476  | 0    | 0    | 0   | 149 | 103  | 112 | 0  | 0  | 0  | 5  | 3  | 4 | 0    | 0    | 0    | 2,69 | 1,19 | 1,84 |
| XP_025081261.1 | collagen alpha-1(I) chain-like isoform X1                   | 134,816 | 558  | 558  | 649 | 149 | 168  | 195 | 3  | 3  | 2  | 2  | 2  | 3 | 0,08 | 0,08 | 0,05 | 0,05 | 0,05 | 0,08 |
| XP_025104800.1 | uncharacterized protein LOC112570531                        | 72,519  | 395  | 474  | 388 | 145 | 158  | 170 | 5  | 6  | 6  | 3  | 4  | 4 | 0,32 | 0,39 | 0,39 | 0,15 | 0,2  | 0,2  |
| XP_025104799.1 | uncharacterized protein LOC112570529                        | 73,828  | 527  | 616  | 510 | 138 | 136  | 220 | 2  | 2  | 6  | 2  | 3  | 3 | 0,44 | 0,51 | 0,51 | 0,1  | 0,15 | 0,15 |
| XP_025076712.1 | heterogeneous nuclear ribonucleoprotein 27C-like isoform X1 | 46,517  | 0    | 0    | 0   | 145 | 153  | 112 | 0  | 0  | 0  | 2  | 3  | 3 | 0    | 0    | 0    | 0,16 | 0,24 | 0,24 |

|                |                                                                |         |      |      |      |     |     |     |    |    |    |   |   |   |      |      |      |      |      |      |
|----------------|----------------------------------------------------------------|---------|------|------|------|-----|-----|-----|----|----|----|---|---|---|------|------|------|------|------|------|
| XP_025114047.1 | uncharacterized protein LOC112576040                           | 25,236  | 429  | 463  | 489  | 145 | 0   | 0   | 8  | 8  | 8  | 3 | 0 | 0 | 1,87 | 1,87 | 1,87 | 0,49 | 0    | 0    |
| XP_025113673.1 | fatty acid-binding protein, liver-like                         | 15,04   | 189  | 174  | 189  | 143 | 111 | 108 | 5  | 5  | 3  | 3 | 3 | 3 | 1,98 | 1,98 | 0,92 | 0,93 | 0,92 | 0,92 |
| XP_025081291.1 | arsenite methyltransferase-like                                | 39,189  | 0    | 0    | 0    | 139 | 128 | 116 | 0  | 0  | 0  | 5 | 3 | 4 | 0    | 0    | 0    | 0,53 | 0,29 | 0,41 |
| XP_025082245.1 | LQP: myosin heavy chain, non-muscle-like                       | 231,417 | 0    | 0    | 0    | 138 | 105 | 116 | 0  | 0  | 0  | 2 | 2 | 2 | 0    | 0    | 0    | 0,03 | 0,03 | 0,03 |
| XP_025098518.1 | stefin-C-like                                                  | 12,205  | 0    | 0    | 0    | 134 | 130 | 119 | 0  | 0  | 0  | 2 | 2 | 2 | 0    | 0    | 0    | 0,7  | 0,7  | 0,7  |
| XP_025086814.1 | uncharacterized protein LOC112559692                           | 38,466  | 0    | 0    | 0    | 132 | 173 | 113 | 0  | 0  | 0  | 3 | 3 | 3 | 0    | 0    | 0    | 0,3  | 0,3  | 0,3  |
| XP_025102335.1 | uncharacterized protein LOC112568962 isoform X1                | 110,994 | 0    | 0    | 52   | 132 | 129 | 147 | 0  | 0  | 2  | 4 | 3 | 3 | 0    | 0    | 0,06 | 0,13 | 0,1  | 0,1  |
| XP_025113277.1 | 40S ribosomal protein S18                                      | 17,782  | 0    | 0    | 0    | 131 | 201 | 155 | 0  | 0  | 0  | 5 | 6 | 6 | 0    | 0    | 0    | 1,53 | 2,04 | 2,04 |
| XP_025086205.1 | nucleoside diphosphate kinase-like                             | 18,639  | 0    | 0    | 0    | 131 | 141 | 109 | 0  | 0  | 0  | 3 | 3 | 4 | 0    | 0    | 0    | 0,7  | 0,7  | 1,03 |
| XP_025084055.1 | uncharacterized protein LOC112558076                           | 19,816  | 134  | 134  | 109  | 129 | 139 | 103 | 2  | 2  | 2  | 3 | 3 | 2 | 0,39 | 0,39 | 0,39 | 0,65 | 0,65 | 0,39 |
| XP_025090775.1 | LQP: tensin-1-like                                             | 181,636 | 1401 | 1428 | 1411 | 127 | 127 | 156 | 14 | 14 | 12 | 4 | 4 | 4 | 0,32 | 0,32 | 0,27 | 0,08 | 0,08 | 0,08 |
| XP_025086204.1 | 40S ribosomal protein S3                                       | 27,597  | 0    | 0    | 0    | 127 | 106 | 135 | 0  | 0  | 0  | 4 | 3 | 5 | 0    | 0    | 0    | 0,62 | 0,44 | 0,83 |
| XP_025083419.1 | small cardioactive peptides-like isoform X1                    | 19,262  | 597  | 551  | 568  | 126 | 143 | 99  | 5  | 5  | 5  | 2 | 2 | 3 | 1,35 | 1,35 | 1,35 | 0,41 | 0,41 | 0,67 |
| XP_025107794.1 | ras-related protein Rap1                                       | 21,046  | 0    | 0    | 0    | 126 | 125 | 157 | 0  | 0  | 0  | 2 | 2 | 2 | 0    | 0    | 0    | 0,37 | 0,37 | 0,37 |
| XP_025093088.1 | 60S ribosomal protein L6-like                                  | 24,672  | 0    | 0    | 0    | 126 | 134 | 114 | 0  | 0  | 0  | 4 | 3 | 3 | 0    | 0    | 0    | 0,72 | 0,5  | 0,5  |
| XP_025083894.1 | profilin-like                                                  | 14,445  | 0    | 0    | 0    | 125 | 112 | 115 | 0  | 0  | 0  | 4 | 3 | 3 | 0    | 0    | 0    | 1,47 | 0,97 | 0,97 |
| XP_025083634.1 | thioredoxin-1-like                                             | 11,743  | 265  | 255  | 262  | 124 | 139 | 125 | 4  | 5  | 4  | 2 | 2 | 3 | 2    | 4,2  | 2,95 | 0,73 | 0,73 | 1,28 |
| XP_025094101.1 | FK506-binding protein 2-like                                   | 24,869  | 404  | 399  | 339  | 121 | 94  | 99  | 6  | 6  | 6  | 3 | 3 | 4 | 1,55 | 1,55 | 1,23 | 0,71 | 0,49 | 0,71 |
| XP_025088543.1 | uncharacterized protein LOC112560733                           | 22,537  | 0    | 0    | 0    | 119 | 0   | 81  | 0  | 0  | 0  | 2 | 0 | 2 | 0    | 0    | 0    | 0,34 | 0    | 0,34 |
| XP_025111371.1 | LQP: 40S ribosomal protein S12-like                            | 15,206  | 265  | 209  | 202  | 118 | 120 | 87  | 6  | 6  | 6  | 3 | 3 | 3 | 2,63 | 2,63 | 2,63 | 0,91 | 0,91 | 0,91 |
| XP_025081568.1 | calcium-binding protein LPS1-beta-like                         | 17,91   | 440  | 349  | 459  | 0   | 156 | 0   | 6  | 6  | 6  | 0 | 2 | 0 | 2,02 | 2,02 | 2,02 | 0    | 0,45 | 0    |
| XP_025106310.1 | gelsolin-like protein 2                                        | 42,15   | 0    | 0    | 0    | 118 | 0   | 100 | 0  | 0  | 0  | 2 | 0 | 2 | 0    | 0    | 0    | 0,17 | 0    | 0,17 |
| XP_025112868.1 | uncharacterized protein LOC112575321 isoform X1                | 270,028 | 91   | 77   | 0    | 116 | 135 | 130 | 2  | 2  | 0  | 5 | 5 | 4 | 0,03 | 0,03 | 0    | 0,06 | 0,06 | 0,05 |
| XP_025086639.1 | LQP: protein lethal(2)essential for life-like                  | 25,522  | 0    | 52   | 0    | 113 | 123 | 91  | 0  | 2  | 0  | 3 | 4 | 2 | 0    | 0,48 | 0    | 0,48 | 0,68 | 0,3  |
| XP_025092572.1 | von Willebrand factor D and EGF domain-containing protein-like | 129,551 | 126  | 116  | 98   | 113 | 0   | 172 | 2  | 2  | 2  | 2 | 0 | 4 | 0,05 | 0,05 | 0,05 | 0,05 | 0    | 0,11 |
| XP_025091415.1 | 40S ribosomal protein S2                                       | 30,526  | 0    | 0    | 0    | 113 | 182 | 203 | 0  | 0  | 0  | 5 | 5 | 6 | 0    | 0    | 0    | 0,73 | 0,73 | 0,93 |
| XP_025109048.1 | peroxiredoxin-like isoform X1                                  | 26,496  | 168  | 126  | 64   | 112 | 112 | 69  | 3  | 3  | 2  | 3 | 3 | 2 | 0,46 | 0,65 | 0,28 | 0,46 | 0,46 | 0,28 |
| XP_025108453.1 | ubiquitin-like modifier-activating enzyme 1                    | 118,163 | 0    | 0    | 0    | 110 | 157 | 134 | 0  | 0  | 0  | 3 | 6 | 4 | 0    | 0    | 0    | 0,09 | 0,19 | 0,12 |
| XP_025111655.1 | spliceosome RNA helicase DDX39B                                | 49,265  | 0    | 0    | 0    | 109 | 94  | 52  | 0  | 0  | 0  | 4 | 4 | 2 | 0    | 0    | 0    | 0,31 | 0,31 | 0,15 |
| XP_025105436.1 | calpain-B-like isoform X1                                      | 93,005  | 0    | 0    | 0    | 108 | 133 | 91  | 0  | 0  | 0  | 2 | 3 | 2 | 0    | 0    | 0    | 0,08 | 0,12 | 0,08 |
| XP_025085932.1 | plastin-1-like                                                 | 70,411  | 0    | 0    | 0    | 105 | 107 | 96  | 0  | 0  | 0  | 2 | 6 | 3 | 0    | 0    | 0    | 0,1  | 0,33 | 0,15 |
| XP_025087916.1 | 40S ribosomal protein S3a                                      | 29,98   | 0    | 0    | 0    | 104 | 106 | 78  | 0  | 0  | 0  | 3 | 4 | 4 | 0    | 0    | 0    | 0,4  | 0,56 | 0,56 |
| XP_025090773.1 | 60S ribosomal protein L23a-like isoform X1                     | 20,864  | 0    | 0    | 0    | 104 | 109 | 69  | 0  | 0  | 0  | 2 | 2 | 2 | 0    | 0    | 0    | 0,37 | 0,37 | 0,37 |
| XP_025114384.1 | PDZ and LIM domain protein 3-like isoform X1                   | 39,885  | 456  | 421  | 412  | 104 | 94  | 101 | 7  | 8  | 7  | 3 | 2 | 3 | 0,8  | 0,96 | 0,8  | 0,29 | 0,18 | 0,29 |
| XP_025082063.1 | tropomodulin-like                                              | 39,402  | 0    | 0    | 0    | 104 | 121 | 0   | 0  | 0  | 0  | 2 | 2 | 0 | 0    | 0    | 0    | 0,19 | 0,19 | 0    |
| XP_025104850.1 | elongation factor 1-gamma-like                                 | 50,033  | 0    | 0    | 0    | 103 | 83  | 0   | 0  | 0  | 0  | 3 | 2 | 0 | 0    | 0    | 0    | 0,22 | 0,14 | 0    |
| XP_025107162.1 | LQP: 60S ribosomal protein L3-like                             | 46,565  | 0    | 0    | 0    | 103 | 212 | 197 | 0  | 0  | 0  | 2 | 4 | 4 | 0    | 0    | 0    | 0,16 | 0,33 | 0,33 |
| XP_025109085.1 | laminin subunit alpha-like                                     | 411,067 | 0    | 55   | 0    | 103 | 220 | 118 | 0  | 2  | 0  | 3 | 5 | 4 | 0    | 0,02 | 0    | 0,03 | 0,05 | 0,03 |
| XP_025094847.1 | glycine--tRNA ligase-like                                      | 88,188  | 0    | 0    | 0    | 101 | 125 | 134 | 0  | 0  | 0  | 2 | 3 | 3 | 0    | 0    | 0    | 0,08 | 0,12 | 0,12 |
| XP_025088674.1 | prosaposin-like                                                | 99,532  | 797  | 780  | 803  | 0   | 0   | 0   | 10 | 12 | 8  | 0 | 0 | 0 | 0,45 | 0,56 | 0,36 | 0    | 0    | 0    |
| XP_025096773.1 | transaldolase-like isoform X1                                  | 36,898  | 0    | 0    | 0    | 100 | 112 | 150 | 0  | 0  | 0  | 3 | 4 | 3 | 0    | 0    | 0    | 0,31 | 0,44 | 0,31 |
| XP_025080657.1 | uncharacterized protein LOC112556148                           | 19,74   | 360  | 368  | 375  | 0   | 0   | 132 | 2  | 2  | 2  | 0 | 0 | 2 | 0,4  | 0,4  | 0,4  | 0    | 0    | 0,4  |
| XP_025112782.1 | 60S ribosomal protein L5-like                                  | 36,194  | 0    | 0    | 0    | 99  | 0   | 96  | 0  | 0  | 0  | 3 | 0 | 2 | 0    | 0    | 0    | 0,32 | 0    | 0,2  |
| XP_025077943.1 | LQP: cartilage matrix protein-like                             | 70,84   | 314  | 195  | 378  | 98  | 0   | 133 | 5  | 5  | 6  | 3 | 0 | 4 | 0,27 | 0,27 | 0,33 | 0,15 | 0    | 0,21 |
| XP_025109560.1 | LQP: 40S ribosomal protein S21-like                            | 9,265   | 221  | 197  | 218  | 0   | 182 | 0   | 2  | 2  | 3  | 0 | 2 | 0 | 1    | 1    | 1,82 | 0    | 1    | 0    |
| XP_025105802.1 | lactoylglutathione lyase-like isoform X1                       | 20,346  | 77   | 72   | 66   | 95  | 96  | 90  | 2  | 2  | 2  | 3 | 2 | 2 | 0,38 | 0,38 | 0,38 | 0,63 | 0,38 | 0,38 |
| XP_025081510.1 | pyruvate kinase PKM-like isoform X1                            | 69,744  | 0    | 0    | 0    | 95  | 136 | 155 | 0  | 0  | 0  | 2 | 3 | 3 | 0    | 0    | 0    | 0,1  | 0,16 | 0,16 |
| XP_025109667.1 | polypyrimidine tract-binding protein 2-like isoform X1         | 64,175  | 0    | 0    | 0    | 94  | 150 | 0   | 0  | 0  | 0  | 2 | 2 | 0 | 0    | 0    | 0    | 0,11 | 0,11 | 0    |
| XP_025088080.1 | 60S ribosomal protein L32-like                                 | 15,994  | 0    | 0    | 0    | 93  | 104 | 0   | 0  | 0  | 0  | 2 | 2 | 0 | 0    | 0    | 0    | 0,51 | 0,51 | 0    |
| XP_025086455.1 | dihydropyrimidinase-like                                       | 63,125  | 71   | 0    | 0    | 93  | 67  | 106 | 3  | 0  | 0  | 4 | 3 | 3 | 0,17 | 0    | 0    | 0,24 | 0,17 | 0,17 |
| XP_025104144.1 | mammalian ependymin-related protein 1-like                     | 24,212  | 261  | 176  | 247  | 93  | 139 | 113 | 4  | 4  | 4  | 2 | 2 | 2 | 0,73 | 0,73 | 0,73 | 0,32 | 0,32 | 0,32 |
| XP_025106938.1 | mitochondrial-processing peptidase subunit beta-like           | 54,081  | 0    | 0    | 0    | 0   | 64  | 134 | 0  | 0  | 0  | 0 | 3 | 2 | 0    | 0    | 0    | 0    | 0,21 | 0,13 |

|                |                                                                               |         |     |      |     |    |     |     |   |    |   |   |   |   |      |      |      |      |      |      |
|----------------|-------------------------------------------------------------------------------|---------|-----|------|-----|----|-----|-----|---|----|---|---|---|---|------|------|------|------|------|------|
| XP_025113992.1 | quinone oxidoreductase-like isoform X1                                        | 35,93   | 0   | 0    | 0   | 0  | 177 | 101 | 0 | 0  | 0 | 0 | 3 | 3 | 0    | 0    | 0    | 0    | 0,32 | 0,32 |
| XP_025085423.1 | 40S ribosomal protein S10-like                                                | 18,224  | 0   | 0    | 0   | 90 | 0   | 59  | 0 | 0  | 0 | 2 | 0 | 2 | 0    | 0    | 0    | 0,44 | 0    | 0,44 |
| XP_025090121.1 | 60S acidic ribosomal protein P1-like                                          | 12,009  | 0   | 0    | 0   | 90 | 98  | 96  | 0 | 0  | 0 | 2 | 2 | 2 | 0    | 0    | 0    | 0,72 | 0,72 | 0,72 |
| XP_025078139.1 | 60S ribosomal protein L17-like                                                | 21,728  | 0   | 0    | 0   | 90 | 61  | 60  | 0 | 0  | 0 | 3 | 2 | 3 | 0    | 0    | 0    | 0,58 | 0,36 | 0,58 |
| XP_025087593.1 | glycogen [starch] synthase-like                                               | 79,825  | 0   | 0    | 0   | 89 | 169 | 104 | 0 | 0  | 0 | 3 | 3 | 2 | 0    | 0    | 0    | 0,14 | 0,14 | 0,09 |
| XP_025092427.1 | flotillin-2-like                                                              | 46,782  | 0   | 0    | 0   | 89 | 70  | 69  | 0 | 0  | 0 | 3 | 2 | 3 | 0    | 0    | 0    | 0,24 | 0,15 | 0,24 |
| XP_025080098.1 | 60S ribosomal protein L8-like                                                 | 28,685  | 0   | 0    | 0   | 89 | 115 | 82  | 0 | 0  | 0 | 3 | 3 | 2 | 0    | 0    | 0    | 0,42 | 0,42 | 0,26 |
| XP_025105813.1 | ribosome-binding protein 1-like isoform X1                                    | 149,175 | 0   | 0    | 0   | 0  | 135 | 152 | 0 | 0  | 0 | 0 | 3 | 4 | 0    | 0    | 0    | 0    | 0,07 | 0,1  |
| XP_025081296.1 | proteasome subunit alpha type-2                                               | 26,349  | 0   | 0    | 0   | 88 | 108 | 87  | 0 | 0  | 0 | 2 | 2 | 2 | 0    | 0    | 0    | 0,29 | 0,29 | 0,29 |
| XP_025076135.1 | fructose-1,6-bisphosphatase 1-like                                            | 37,452  | 115 | 103  | 0   | 87 | 130 | 54  | 3 | 2  | 0 | 3 | 4 | 2 | 0,31 | 0,2  | 0    | 0,31 | 0,43 | 0,2  |
| XP_025082862.1 | PDZ and LIM domain protein 5-like                                             | 22,253  | 674 | 762  | 770 | 86 | 126 | 75  | 7 | 8  | 7 | 2 | 2 | 2 | 1,84 | 2,3  | 1,84 | 0,35 | 0,35 | 0,35 |
| XP_025082818.1 | triosephosphate isomerase-like                                                | 28,702  | 83  | 0    | 105 | 86 | 115 | 110 | 3 | 0  | 3 | 4 | 4 | 3 | 0,42 | 0    | 0,42 | 0,59 | 0,59 | 0,42 |
| XP_025092955.1 | aconitate hydratase, mitochondrial-like                                       | 85,379  | 0   | 0    | 0   | 86 | 172 | 88  | 0 | 0  | 0 | 2 | 3 | 2 | 0    | 0    | 0    | 0,08 | 0,13 | 0,08 |
| XP_025116005.1 | uncharacterized protein LOC112577210 isoform X1                               | 36,719  | 79  | 74   | 109 | 85 | 83  | 62  | 4 | 4  | 3 | 3 | 2 | 2 | 0,44 | 0,44 | 0,31 | 0,31 | 0,2  | 0,2  |
| XP_025103394.1 | probable methylmalonate-semialdehyde dehydrogenase [acylating], mitochondrial | 57,119  | 0   | 0    | 0   | 0  | 105 | 176 | 0 | 0  | 0 | 0 | 2 | 3 | 0    | 0    | 0    | 0    | 0,13 | 0,19 |
| XP_025100959.1 | uncharacterized protein LOC112568087                                          | 21,521  | 0   | 0    | 0   | 85 | 58  | 0   | 0 | 0  | 0 | 3 | 2 | 0 | 0    | 0    | 0    | 0,59 | 0,36 | 0    |
| XP_025112729.1 | uncharacterized protein LOC112575240                                          | 33,74   | 0   | 0    | 0   | 84 | 74  | 74  | 0 | 0  | 0 | 2 | 2 | 2 | 0    | 0    | 0    | 0,22 | 0,22 | 0,22 |
| XP_025107611.1 | laminin subunit beta-1-like                                                   | 202,317 | 0   | 0    | 0   | 84 | 69  | 59  | 0 | 0  | 0 | 4 | 2 | 2 | 0    | 0    | 0    | 0,07 | 0,03 | 0,03 |
| XP_025103993.1 | titin homolog isoform X1                                                      | 222,758 | 0   | 2200 | 0   | 83 | 106 | 0   | 0 | 35 | 0 | 7 | 4 | 0 | 0    | 0,7  | 0    | 0,11 | 0,06 | 0    |
| XP_025089133.1 | fatty acid-binding protein, adipocyte-like                                    | 14,871  | 312 | 305  | 243 | 81 | 107 | 80  | 3 | 3  | 3 | 2 | 2 | 2 | 0,93 | 0,93 | 0,93 | 0,55 | 0,55 | 0,55 |
| XP_025087837.1 | 60S ribosomal protein L12-like                                                | 17,801  | 0   | 0    | 0   | 81 | 98  | 120 | 0 | 0  | 0 | 2 | 3 | 4 | 0    | 0    | 0    | 0,45 | 0,74 | 1,1  |
| XP_025116283.1 | uncharacterized protein LOC112577430 isoform X1                               | 72,441  | 0   | 0    | 0   | 80 | 126 | 65  | 0 | 0  | 0 | 4 | 4 | 3 | 0    | 0    | 0    | 0,21 | 0,2  | 0,15 |
| XP_025096378.1 | ras-like GTP-binding protein RHO                                              | 36,715  | 0   | 0    | 0   | 79 | 56  | 51  | 0 | 0  | 0 | 3 | 3 | 2 | 0    | 0    | 0    | 0,31 | 0,31 | 0,2  |
| XP_025091729.1 | 60S ribosomal protein L19-like                                                | 23,397  | 0   | 0    | 0   | 77 | 0   | 42  | 0 | 0  | 0 | 2 | 0 | 2 | 0    | 0    | 0    | 0,33 | 0    | 0,33 |
| XP_025096000.1 | 60S ribosomal protein L27-like                                                | 16,229  | 0   | 0    | 0   | 77 | 61  | 77  | 0 | 0  | 0 | 3 | 3 | 3 | 0    | 0    | 0    | 0,84 | 0,83 | 0,83 |
| XP_025097402.1 | tubulin polymerization-promoting protein family member 2-like                 | 21,142  | 105 | 82   | 0   | 0  | 0   | 0   | 2 | 2  | 0 | 0 | 0 | 0 | 0,37 | 0,37 | 0    | 0    | 0    | 0    |
| XP_025112013.1 | 40S ribosomal protein S9                                                      | 22,39   | 0   | 0    | 0   | 76 | 73  | 72  | 0 | 0  | 0 | 2 | 3 | 2 | 0    | 0    | 0    | 0,34 | 0,56 | 0,34 |
| XP_025094074.1 | LQP: uncharacterized protein LOC112563873                                     | 128,795 | 0   | 0    | 0   | 74 | 66  | 38  | 0 | 0  | 0 | 2 | 3 | 2 | 0    | 0    | 0    | 0,05 | 0,08 | 0,05 |
| XP_025092020.1 | 60S ribosomal protein L7-like                                                 | 28,447  | 0   | 0    | 0   | 72 | 89  | 82  | 0 | 0  | 0 | 3 | 4 | 3 | 0    | 0    | 0    | 0,42 | 0,6  | 0,42 |
| XP_025087859.1 | LQP: BTB/POZ domain-containing protein KCTD12-like                            | 30,712  | 76  | 0    | 0   | 71 | 90  | 81  | 2 | 0  | 0 | 2 | 2 | 2 | 0,24 | 0    | 0    | 0,24 | 0,24 | 0,24 |
| XP_025103882.1 | histone H2A                                                                   | 13,649  | 0   | 0    | 0   | 70 | 114 | 81  | 0 | 0  | 0 | 3 | 4 | 4 | 0    | 0    | 0    | 1,05 | 1,6  | 1,6  |
| XP_025111693.1 | collagen alpha-1(I) chain-like                                                | 171,566 | 293 | 315  | 242 | 0  | 0   | 0   | 5 | 5  | 5 | 0 | 0 | 0 | 0,13 | 0,13 | 0,13 | 0    | 0    | 0    |
| XP_025098586.1 | cystatin-B-like                                                               | 11,319  | 0   | 51   | 54  | 0  | 0   | 0   | 0 | 2  | 2 | 0 | 0 | 0 | 0    | 0,77 | 0,77 | 0    | 0    | 0    |
| XP_025098510.1 | 40S ribosomal protein S15Aa                                                   | 14,976  | 0   | 0    | 0   | 69 | 87  | 0   | 0 | 0  | 0 | 2 | 2 | 0 | 0    | 0    | 0    | 0,55 | 0,55 | 0    |
| XP_025110976.1 | phosphoglucumutase-1-like                                                     | 62,002  | 0   | 0    | 0   | 69 | 74  | 0   | 0 | 0  | 0 | 2 | 2 | 0 | 0    | 0    | 0    | 0,11 | 0,11 | 0    |
| XP_025097167.1 | 60S ribosomal protein L24-like                                                | 17,809  | 0   | 0    | 0   | 68 | 85  | 59  | 0 | 0  | 0 | 2 | 2 | 2 | 0    | 0    | 0    | 0,45 | 0,45 | 0,45 |
| XP_025092850.1 | dolichyl-diphosphooligosaccharide--protein glycosyltransferase subunit 2-like | 70,075  | 0   | 0    | 0   | 68 | 0   | 57  | 0 | 0  | 0 | 2 | 0 | 2 | 0    | 0    | 0    | 0,1  | 0    | 0,1  |
| XP_025115104.1 | hemocyte protein-glutamine gamma-glutamyltransferase-like isoform X1          | 87,766  | 0   | 0    | 0   | 66 | 65  | 65  | 0 | 0  | 0 | 4 | 4 | 3 | 0    | 0    | 0    | 0,17 | 0,17 | 0,12 |
| XP_025107641.1 | universal stress protein A-like protein                                       | 17,455  | 0   | 0    | 0   | 66 | 0   | 75  | 0 | 0  | 0 | 2 | 0 | 2 | 0    | 0    | 0    | 0,46 | 0    | 0,46 |
| XP_025087122.1 | myotrophin-like                                                               | 13,092  | 345 | 413  | 338 | 63 | 121 | 67  | 5 | 4  | 5 | 3 | 3 | 3 | 2,46 | 1,7  | 2,46 | 1,11 | 1,1  | 1,1  |
| XP_025105795.1 | protein phosphatase 1B-like isoform X1                                        | 43,227  | 0   | 0    | 0   | 63 | 65  | 59  | 0 | 0  | 0 | 3 | 3 | 3 | 0    | 0    | 0    | 0,26 | 0,26 | 0,26 |
| XP_025093952.1 | uncharacterized protein LOC112563809                                          | 28,586  | 0   | 0    | 0   | 63 | 65  | 78  | 0 | 0  | 0 | 4 | 5 | 3 | 0    | 0    | 0    | 0,59 | 0,79 | 0,42 |
| XP_025097674.1 | peroxiredoxin-2-like                                                          | 28,899  | 0   | 73   | 0   | 63 | 74  | 82  | 0 | 2  | 0 | 2 | 2 | 2 | 0    | 0,41 | 0    | 0,26 | 0,26 | 0,26 |
| XP_025088440.1 | uncharacterized protein LOC112560658 isoform X1                               | 15,836  | 355 | 341  | 381 | 0  | 0   | 0   | 2 | 2  | 2 | 0 | 0 | 0 | 0,51 | 0,51 | 0,51 | 0    | 0    | 0    |
| XP_025101599.1 | phospholipid transfer protein C2CD2L-like                                     | 81,23   | 248 | 117  | 160 | 0  | 88  | 74  | 3 | 3  | 3 | 0 | 2 | 2 | 0,13 | 0,13 | 0,13 | 0    | 0,09 | 0,09 |
| XP_025081438.1 | LIM and SH3 domain protein F42H10.3-like isoform X1                           | 35,63   | 0   | 0    | 0   | 60 | 69  | 70  | 0 | 0  | 0 | 2 | 3 | 2 | 0    | 0    | 0    | 0,21 | 0,33 | 0,21 |
| XP_025086082.1 | LQP: septin-11-like                                                           | 47,525  | 0   | 0    | 0   | 59 | 70  | 31  | 0 | 0  | 0 | 2 | 2 | 2 | 0    | 0    | 0    | 0,15 | 0,15 | 0,15 |
| XP_025083868.1 | heterogeneous nuclear ribonucleoprotein D-like                                | 38,546  | 0   | 0    | 0   | 56 | 78  | 0   | 0 | 0  | 0 | 2 | 2 | 0 | 0    | 0    | 0    | 0,19 | 0,19 | 0    |
| XP_025109837.1 | 2-iminobutanoate/2-iminopropanoate deaminase-like                             | 14,184  | 406 | 404  | 358 | 0  | 0   | 0   | 6 | 6  | 6 | 0 | 0 | 0 | 2,96 | 2,96 | 2,96 | 0    | 0    | 0    |
| XP_025100558.1 | 40S ribosomal protein S19-like isoform X1                                     | 20,188  | 0   | 0    | 0   | 54 | 75  | 0   | 0 | 0  | 0 | 2 | 2 | 0 | 0    | 0    | 0    | 0,39 | 0,39 | 0    |
| XP_025097427.1 | beta-parvin-like                                                              | 42,271  | 0   | 0    | 0   | 54 | 49  | 43  | 0 | 0  | 0 | 2 | 2 | 2 | 0    | 0    | 0    | 0,17 | 0,17 | 0,17 |
| XP_025106346.1 | dolichyl-diphosphooligosaccharide--protein glycosyltransferase subunit 1-like | 68,993  | 0   | 0    | 0   | 0  | 57  | 43  | 0 | 0  | 0 | 0 | 3 | 2 | 0    | 0    | 0    | 0    | 0,16 | 0,1  |

|                |                                                                                      |         |      |      |      |    |     |     |    |    |    |   |   |   |      |      |      |      |      |      |
|----------------|--------------------------------------------------------------------------------------|---------|------|------|------|----|-----|-----|----|----|----|---|---|---|------|------|------|------|------|------|
| XP_025090868.1 | glutathione peroxidase-like                                                          | 26,603  | 91   | 75   | 98   | 49 | 0   | 0   | 4  | 4  | 4  | 2 | 0 | 0 | 0,65 | 0,65 | 0,65 | 0,28 | 0    | 0    |
| XP_025095897.1 | fucose mutarotase-like                                                               | 16,766  | 239  | 350  | 305  | 0  | 0   | 67  | 5  | 5  | 5  | 0 | 0 | 2 | 1,66 | 1,66 | 2,24 | 0    | 0    | 0,48 |
| XP_025095580.1 | chitotriosidase-1-like isoform X1                                                    | 38,127  | 0    | 0    | 0    | 47 | 58  | 43  | 0  | 0  | 0  | 3 | 2 | 2 | 0    | 0    | 0    | 0,3  | 0,19 | 0,19 |
| XP_025078843.1 | glycogenin-1-like isoform X1                                                         | 66,174  | 256  | 235  | 245  | 47 | 42  | 54  | 6  | 6  | 7  | 3 | 3 | 3 | 0,36 | 0,36 | 0,43 | 0,17 | 0,17 | 0,17 |
| XP_025087561.1 | uncharacterized protein LOC112560159 isoform X1                                      | 15,686  | 205  | 173  | 198  | 0  | 0   | 0   | 2  | 2  | 2  | 0 | 0 | 0 | 0,52 | 0,52 | 0,52 | 0    | 0    | 0    |
| XP_025106405.1 | dystroglycan-like                                                                    | 95,017  | 357  | 339  | 301  | 0  | 0   | 0   | 4  | 4  | 3  | 0 | 0 | 0 | 0,15 | 0,15 | 0,11 | 0    | 0    | 0    |
| XP_025086042.1 | Na(+)/H(+) exchange regulatory cofactor NHE-RF1-like isoform X1                      | 53,7    | 289  | 292  | 278  | 0  | 0   | 0   | 5  | 7  | 8  | 0 | 0 | 0 | 0,37 | 0,55 | 0,65 | 0    | 0    | 0    |
| XP_025077177.1 | 60S ribosomal protein L4-like                                                        | 45,469  | 0    | 0    | 0    | 43 | 32  | 0   | 0  | 0  | 0  | 2 | 2 | 0 | 0    | 0    | 0    | 0,16 | 0,16 | 0    |
| XP_025085605.1 | annexin A7-like                                                                      | 56,197  | 0    | 0    | 0    | 0  | 72  | 92  | 0  | 0  | 0  | 0 | 3 | 4 | 0    | 0    | 0    | 0    | 0,2  | 0,27 |
| XP_025079223.1 | uncharacterized protein LOC112555178                                                 | 46,253  | 200  | 137  | 183  | 0  | 0   | 0   | 4  | 4  | 4  | 0 | 0 | 0 | 0,34 | 0,34 | 0,34 | 0    | 0    | 0    |
| XP_025107147.1 | transforming growth factor-beta-induced protein ig-h3-like                           | 34,438  | 896  | 891  | 848  | 0  | 55  | 0   | 10 | 12 | 11 | 0 | 2 | 0 | 1,91 | 2,54 | 2,21 | 0    | 0,21 | 0    |
| XP_025079302.1 | uncharacterized protein LOC112555220                                                 | 12,065  | 162  | 154  | 175  | 0  | 0   | 0   | 4  | 4  | 4  | 0 | 0 | 0 | 1,92 | 1,92 | 1,92 | 0    | 0    | 0    |
| XP_025092851.1 | tumor protein D54-like isoform X1                                                    | 30,235  | 132  | 0    | 90   | 0  | 0   | 0   | 2  | 0  | 2  | 0 | 0 | 0 | 0,25 | 0    | 0,25 | 0    | 0    | 0    |
| XP_025100206.1 | ATP synthase-coupling factor 6, mitochondrial-like                                   | 15,27   | 284  | 264  | 229  | 0  | 31  | 0   | 5  | 6  | 6  | 0 | 2 | 0 | 1,91 | 2,6  | 2,6  | 0    | 0,53 | 0    |
| XP_025090122.1 | 60S ribosomal protein L30-like                                                       | 13,181  | 0    | 0    | 0    | 38 | 0   | 35  | 0  | 0  | 0  | 2 | 0 | 2 | 0    | 0    | 0    | 0,64 | 0    | 0,64 |
| XP_025076144.1 | beta-1,3-glucan-binding protein-like                                                 | 50,673  | 0    | 0    | 0    | 0  | 44  | 97  | 0  | 0  | 0  | 0 | 3 | 3 | 0    | 0    | 0    | 0    | 0,22 | 0,22 |
| XP_025078861.1 | pollen-specific leucine-rich repeat extensin-like protein 1                          | 47,92   | 0    | 171  | 84   | 0  | 0   | 0   | 0  | 2  | 2  | 0 | 0 | 0 | 0    | 0,15 | 0,15 | 0    | 0    | 0    |
| XP_025097582.1 | cathepsin L1-like                                                                    | 40,372  | 403  | 322  | 313  | 34 | 0   | 0   | 5  | 5  | 5  | 2 | 0 | 0 | 0,51 | 0,51 | 0,51 | 0,18 | 0    | 0    |
| XP_025088165.1 | histone H3.v1-like                                                                   | 12,893  | 122  | 0    | 73   | 0  | 0   | 50  | 2  | 0  | 2  | 0 | 0 | 2 | 0,66 | 0    | 0,66 | 0    | 0    | 0,66 |
| XP_025104532.1 | short-chain collagen C4-like                                                         | 32,968  | 242  | 149  | 156  | 0  | 0   | 0   | 6  | 5  | 5  | 0 | 0 | 0 | 0,84 | 0,66 | 0,66 | 0    | 0    | 0    |
| XP_025093470.1 | dynactin subunit 2-like                                                              | 45,625  | 178  | 109  | 99   | 0  | 0   | 0   | 4  | 3  | 4  | 0 | 0 | 0 | 0,34 | 0,25 | 0,34 | 0    | 0    | 0    |
| XP_025113923.1 | fatty acid-binding protein, liver-like                                               | 15,22   | 213  | 192  | 163  | 0  | 0   | 0   | 4  | 4  | 4  | 0 | 0 | 0 | 1,36 | 1,36 | 1,36 | 0    | 0    | 0    |
| XP_025112876.1 | uncharacterized protein LOC112575323                                                 | 98,079  | 0    | 0    | 0    | 0  | 79  | 33  | 0  | 0  | 0  | 0 | 2 | 2 | 0    | 0    | 0    | 0    | 0,07 | 0,07 |
| XP_025114330.1 | tubulin beta chain                                                                   | 50,319  | 559  | 528  | 447  | 0  | 0   | 0   | 11 | 10 | 9  | 0 | 0 | 0 | 1,09 | 0,95 | 0,83 | 0    | 0    | 0    |
| XP_025108539.1 | ankyrin-2-like isoform X1                                                            | 361,409 | 0    | 0    | 0    | 0  | 243 | 140 | 0  | 0  | 0  | 0 | 5 | 3 | 0    | 0    | 0    | 0    | 0,05 | 0,03 |
| XP_025081749.1 | guanine nucleotide-binding protein subunit beta isoform X2                           | 37,965  | 0    | 0    | 0    | 0  | 120 | 151 | 0  | 0  | 0  | 0 | 5 | 5 | 0    | 0    | 0    | 0    | 0,7  | 0,55 |
| XP_025083230.1 | LQP: melanotransferrin-like                                                          | 80,302  | 234  | 147  | 0    | 0  | 0   | 0   | 3  | 2  | 0  | 0 | 0 | 0 | 0,13 | 0,09 | 0    | 0    | 0    | 0    |
| XP_025082468.1 | LQP: 60S ribosomal protein L18-like                                                  | 21,639  | 0    | 0    | 0    | 0  | 72  | 53  | 0  | 0  | 0  | 0 | 2 | 2 | 0    | 0    | 0    | 0    | 0,36 | 0,36 |
| XP_025093782.1 | chitotriosidase-1-like                                                               | 41,703  | 86   | 91   | 150  | 0  | 0   | 0   | 2  | 4  | 3  | 0 | 0 | 0 | 0,17 | 0,38 | 0,27 | 0    | 0    | 0    |
| XP_025096536.1 | ubiquitin-conjugating enzyme E2 2                                                    | 20,496  | 0    | 0    | 0    | 0  | 56  | 30  | 0  | 0  | 0  | 0 | 2 | 2 | 0    | 0    | 0    | 0    | 0,38 | 0,38 |
| XP_025079812.1 | uncharacterized protein LOC112555596                                                 | 17,644  | 269  | 286  | 203  | 0  | 0   | 0   | 3  | 3  | 3  | 0 | 0 | 0 | 0,75 | 0,75 | 0,75 | 0    | 0    | 0    |
| XP_025082010.1 | myosin-2 essential light chain-like                                                  | 16,923  | 794  | 725  | 700  | 0  | 49  | 77  | 10 | 8  | 8  | 0 | 3 | 2 | 7,5  | 4,76 | 3,74 | 0    | 0,79 | 0,48 |
| XP_025092057.1 | thioredoxin domain-containing protein 17-like                                        | 14,159  | 57   | 54   | 72   | 0  | 0   | 0   | 2  | 3  | 2  | 0 | 0 | 0 | 0,58 | 0,99 | 0,58 | 0    | 0    | 0    |
| XP_025095124.1 | calmodulin-like                                                                      | 17,104  | 180  | 286  | 257  | 0  | 0   | 0   | 4  | 5  | 4  | 0 | 0 | 0 | 1,16 | 1,61 | 1,16 | 0    | 0    | 0    |
| XP_025089653.1 | leupaxin-like isoform X1                                                             | 70,025  | 149  | 151  | 111  | 0  | 0   | 0   | 2  | 3  | 3  | 0 | 0 | 0 | 0,1  | 0,16 | 0,16 | 0    | 0    | 0    |
| XP_025088872.1 | complement component 1 Qsubcomponent-binding protein, mitochondrial-like             | 31,24   | 0    | 57   | 81   | 0  | 0   | 0   | 0  | 2  | 2  | 0 | 0 | 0 | 0    | 0,24 | 0,24 | 0    | 0    | 0    |
| XP_025104008.1 | titin homolog isoform X3                                                             | 207,977 | 1812 | 0    | 1957 | 0  | 0   | 100 | 30 | 0  | 25 | 0 | 0 | 4 | 0,63 | 0    | 0,5  | 0    | 0    | 0,07 |
| XP_025111818.1 | LQP: lysosomal alpha-mannosidase-like                                                | 113,194 | 122  | 99   | 135  | 0  | 0   | 0   | 3  | 2  | 2  | 0 | 0 | 0 | 0,09 | 0,06 | 0,06 | 0    | 0    | 0    |
| XP_025083732.1 | glycine, glutamate and proline-rich protein-like                                     | 23,715  | 326  | 192  | 121  | 0  | 0   | 0   | 3  | 2  | 3  | 0 | 0 | 0 | 0,52 | 0,32 | 0,52 | 0    | 0    | 0    |
| XP_025094607.1 | uncharacterized protein LOC112564180                                                 | 43,433  | 197  | 214  | 129  | 0  | 0   | 0   | 3  | 4  | 3  | 0 | 0 | 0 | 0,26 | 0,36 | 0,26 | 0    | 0    | 0    |
| XP_025090869.1 | ATPase inhibitor mai-2, mitochondrial-like isoform X1                                | 12,938  | 155  | 124  | 65   | 0  | 0   | 0   | 4  | 5  | 3  | 0 | 0 | 0 | 1,72 | 2,49 | 1,12 | 0    | 0    | 0    |
| XP_025082604.1 | basement membrane-specific heparan sulfate proteoglycan core protein-like isoform X5 | 524,897 | 4660 | 4468 | 0    | 0  | 0   | 0   | 81 | 75 | 0  | 0 | 0 | 0 | 0,69 | 0,64 | 0    | 0    | 0    | 0    |
| XP_025081479.1 | talin-1-like isoform X13                                                             | 235,752 | 1456 | 1357 | 1405 | 0  | 0   | 0   | 24 | 23 | 21 | 0 | 0 | 0 | 0,41 | 0,39 | 0,35 | 0    | 0    | 0    |
| XP_025092885.1 | proprotein convertase subtilisin/kexin type 5-like                                   | 17,517  | 914  | 848  | 779  | 0  | 0   | 0   | 2  | 2  | 2  | 0 | 0 | 0 | 0,75 | 0,75 | 0,75 | 0    | 0    | 0    |
| XP_025091493.1 | extensin-like isoform X7                                                             | 103,251 | 838  | 1056 | 842  | 0  | 0   | 0   | 15 | 15 | 15 | 0 | 0 | 0 | 0,58 | 0,58 | 0,58 | 0    | 0    | 0    |
| XP_025114843.1 | uncharacterized protein LOC112576527 isoform X11                                     | 36,026  | 702  | 834  | 0    | 0  | 0   | 0   | 6  | 5  | 0  | 0 | 0 | 0 | 1,3  | 1,1  | 0    | 0    | 0    | 0    |
| XP_025093891.1 | LQP: tubulin alpha-1A chain-like                                                     | 50,691  | 686  | 552  | 432  | 0  | 0   | 0   | 3  | 2  | 2  | 0 | 0 | 0 | 0,7  | 0,7  | 0,59 | 0    | 0    | 0    |
| XP_025091013.1 | collagen alpha-5(VI) chain-like isoform X1                                           | 51,217  | 602  | 0    | 614  | 0  | 0   | 0   | 10 | 0  | 8  | 0 | 0 | 0 | 0,93 | 0    | 0,69 | 0    | 0    | 0    |
| XP_025100362.1 | calmodulin, striated muscle-like isoform X2                                          | 11,862  | 566  | 553  | 0    | 0  | 0   | 0   | 6  | 6  | 0  | 0 | 0 | 0 | 5,73 | 5,73 | 0    | 0    | 0    | 0    |
| XP_025105683.1 | uncharacterized protein LOC112571088                                                 | 74,251  | 556  | 645  | 0    | 0  | 0   | 0   | 3  | 3  | 0  | 0 | 0 | 0 | 0,44 | 0,51 | 0    | 0    | 0    | 0    |
| XP_025079883.1 | collagen alpha-2(IV) chain-like                                                      | 139,15  | 453  | 311  | 332  | 0  | 0   | 0   | 6  | 6  | 5  | 0 | 0 | 0 | 0,19 | 0,16 | 0,13 | 0    | 0    | 0    |
| XP_025081440.1 | LIM and SH3 domain protein F42H10.3-like isoform X3                                  | 34,807  | 418  | 429  | 433  | 0  | 0   | 0   | 7  | 6  | 7  | 0 | 0 | 0 | 0,96 | 0,78 | 0,96 | 0    | 0    | 0    |



|                |                                                                           |         |     |     |     |   |   |   |    |    |    |   |   |   |      |      |      |   |   |   |
|----------------|---------------------------------------------------------------------------|---------|-----|-----|-----|---|---|---|----|----|----|---|---|---|------|------|------|---|---|---|
| XP_025079333.1 | calmodulin-like                                                           | 16,677  | 340 | 336 | 280 | 0 | 0 | 0 | 3  | 3  | 3  | 0 | 0 | 0 | 0,81 | 0,81 | 0,81 | 0 | 0 | 0 |
| XP_025107571.1 | inter-alpha-trypsin inhibitor heavy chain H3-like                         | 99,962  | 329 | 413 | 357 | 0 | 0 | 0 | 11 | 12 | 11 | 0 | 0 | 0 | 0,45 | 0,5  | 0,45 | 0 | 0 | 0 |
| XP_025106287.1 | dipeptidyl peptidase 1-like                                               | 52,995  | 311 | 357 | 331 | 0 | 0 | 0 | 4  | 4  | 4  | 0 | 0 | 0 | 0,29 | 0,29 | 0,29 | 0 | 0 | 0 |
| XP_025079817.1 | LQP: uncharacterized protein LOC112555602                                 | 69,351  | 309 | 335 | 278 | 0 | 0 | 0 | 5  | 5  | 7  | 0 | 0 | 0 | 0,28 | 0,28 | 0,41 | 0 | 0 | 0 |
| XP_025116102.1 | calbindin-32-like isoform X1                                              | 36,511  | 305 | 402 | 363 | 0 | 0 | 0 | 5  | 6  | 6  | 0 | 0 | 0 | 0,58 | 0,73 | 0,73 | 0 | 0 | 0 |
| XP_025079882.1 | collagen alpha-5(IV) chain-like                                           | 173,514 | 301 | 270 | 185 | 0 | 0 | 0 | 6  | 6  | 6  | 0 | 0 | 0 | 0,12 | 0,12 | 0,12 | 0 | 0 | 0 |
| XP_025106308.1 | gelsolin-like protein 2 isoform X1                                        | 41,888  | 297 | 249 | 229 | 0 | 0 | 0 | 5  | 5  | 5  | 0 | 0 | 0 | 0,49 | 0,49 | 0,49 | 0 | 0 | 0 |
| XP_025110417.1 | reticulocalbin-2-like                                                     | 35,983  | 284 | 274 | 236 | 0 | 0 | 0 | 6  | 7  | 6  | 0 | 0 | 0 | 0,75 | 0,92 | 0,75 | 0 | 0 | 0 |
| XP_025080910.1 | lipoma-preferred partner homolog                                          | 31,112  | 279 | 175 | 260 | 0 | 0 | 0 | 5  | 5  | 4  | 0 | 0 | 0 | 0,71 | 0,71 | 0,54 | 0 | 0 | 0 |
| XP_025092566.1 | protein obstructor-E-like                                                 | 18,955  | 270 | 297 | 304 | 0 | 0 | 0 | 5  | 5  | 5  | 0 | 0 | 0 | 1,83 | 1,38 | 1,38 | 0 | 0 | 0 |
| XP_025086087.1 | uncharacterized protein LOC112559237 isoform X1                           | 27,276  | 267 | 246 | 205 | 0 | 0 | 0 | 3  | 3  | 2  | 0 | 0 | 0 | 0,44 | 0,44 | 0,28 | 0 | 0 | 0 |
| XP_025101009.1 | uncharacterized protein LOC112568120 isoform X1                           | 133,416 | 240 | 194 | 228 | 0 | 0 | 0 | 5  | 5  | 5  | 0 | 0 | 0 | 0,14 | 0,14 | 0,14 | 0 | 0 | 0 |
| XP_025096935.1 | whey acidic protein-like isoform X1                                       | 23,165  | 226 | 252 | 141 | 0 | 0 | 0 | 2  | 3  | 3  | 0 | 0 | 0 | 0,33 | 0,54 | 0,54 | 0 | 0 | 0 |
| XP_025113591.1 | uncharacterized protein LOC112575783                                      | 25,007  | 216 | 205 | 195 | 0 | 0 | 0 | 3  | 3  | 3  | 0 | 0 | 0 | 0,49 | 0,49 | 0,49 | 0 | 0 | 0 |
| XP_025110822.1 | glucosidase 2 subunit beta-like isoform X1                                | 64,125  | 211 | 189 | 105 | 0 | 0 | 0 | 7  | 5  | 4  | 0 | 0 | 0 | 0,44 | 0,3  | 0,23 | 0 | 0 | 0 |
| XP_025111425.1 | nuclear autoantigenic sperm protein-like                                  | 78,609  | 186 | 176 | 133 | 0 | 0 | 0 | 5  | 3  | 4  | 0 | 0 | 0 | 0,24 | 0,14 | 0,19 | 0 | 0 | 0 |
| XP_025099450.1 | temptin-like isoform X1                                                   | 16,743  | 184 | 171 | 183 | 0 | 0 | 0 | 2  | 2  | 2  | 0 | 0 | 0 | 0,48 | 0,48 | 0,48 | 0 | 0 | 0 |
| XP_025113972.1 | uncharacterized protein LOC112575997                                      | 15,844  | 178 | 159 | 92  | 0 | 0 | 0 | 2  | 2  | 2  | 0 | 0 | 0 | 0,51 | 0,51 | 0,51 | 0 | 0 | 0 |
| XP_025098500.1 | uncharacterized protein LOC112566496                                      | 11,776  | 173 | 188 | 203 | 0 | 0 | 0 | 2  | 2  | 2  | 0 | 0 | 0 | 0,73 | 0,73 | 0,73 | 0 | 0 | 0 |
| XP_025099452.1 | temptin-like isoform X3                                                   | 16,563  | 171 | 110 | 0   | 0 | 0 | 0 | 2  | 2  | 0  | 0 | 0 | 0 | 0,49 | 0,49 | 0    | 0 | 0 | 0 |
| XP_025080338.1 | uncharacterized protein LOC112555941                                      | 14,457  | 167 | 217 | 185 | 0 | 0 | 0 | 3  | 4  | 3  | 0 | 0 | 0 | 0,97 | 1,47 | 0,97 | 0 | 0 | 0 |
| XP_025079520.1 | LAMP family protein Imp-1-like                                            | 39,793  | 163 | 215 | 111 | 0 | 0 | 0 | 2  | 2  | 2  | 0 | 0 | 0 | 0,18 | 0,18 | 0,18 | 0 | 0 | 0 |
| XP_025108426.1 | low-density lipoprotein receptor class A domain-containing protein 3-like | 17,586  | 154 | 166 | 155 | 0 | 0 | 0 | 2  | 2  | 2  | 0 | 0 | 0 | 0,45 | 0,45 | 0,45 | 0 | 0 | 0 |
| XP_025096824.1 | SH3 domain-binding glutamic acid-rich protein homolog                     | 33,417  | 154 | 128 | 92  | 0 | 0 | 0 | 4  | 4  | 4  | 0 | 0 | 0 | 0,49 | 0,49 | 0,49 | 0 | 0 | 0 |
| XP_025114909.1 | programmed cell death protein 5-like                                      | 15,134  | 150 | 236 | 92  | 0 | 0 | 0 | 3  | 3  | 4  | 0 | 0 | 0 | 0,91 | 0,91 | 1,38 | 0 | 0 | 0 |
| XP_025099231.1 | uncharacterized protein LOC112567014                                      | 13,109  | 149 | 156 | 120 | 0 | 0 | 0 | 2  | 3  | 3  | 0 | 0 | 0 | 0,64 | 1,1  | 1,1  | 0 | 0 | 0 |
| XP_025077656.1 | cytochrome b-c1 complex subunit 6, mitochondrial-like                     | 12,11   | 146 | 103 | 0   | 0 | 0 | 0 | 2  | 2  | 0  | 0 | 0 | 0 | 0,71 | 0,71 | 0    | 0 | 0 | 0 |
| XP_025108739.1 | uncharacterized protein LOC112572951 isoform X1                           | 84,553  | 138 | 146 | 92  | 0 | 0 | 0 | 2  | 2  | 3  | 0 | 0 | 0 | 0,08 | 0,08 | 0,13 | 0 | 0 | 0 |
| XP_025099105.1 | uncharacterized protein LOC112566898 isoform X1                           | 43,391  | 137 | 92  | 89  | 0 | 0 | 0 | 2  | 2  | 2  | 0 | 0 | 0 | 0,17 | 0,17 | 0,17 | 0 | 0 | 0 |
| XP_025088922.1 | chitin-binding domain protein cbd-1-like                                  | 17,671  | 133 | 79  | 99  | 0 | 0 | 0 | 3  | 3  | 3  | 0 | 0 | 0 | 0,75 | 0,75 | 0,75 | 0 | 0 | 0 |
| XP_025081201.1 | ATP synthase subunit delta, mitochondrial-like                            | 17,628  | 132 | 152 | 0   | 0 | 0 | 0 | 3  | 3  | 0  | 0 | 0 | 0 | 0,75 | 0,75 | 0    | 0 | 0 | 0 |
| XP_025087541.1 | myomodulin neuropeptides 1-like                                           | 37,555  | 130 | 126 | 127 | 0 | 0 | 0 | 2  | 2  | 2  | 0 | 0 | 0 | 0,2  | 0,2  | 0,2  | 0 | 0 | 0 |
| XP_025091642.1 | C-type lectin domain family 4 member F-like                               | 78,968  | 108 | 111 | 0   | 0 | 0 | 0 | 2  | 2  | 0  | 0 | 0 | 0 | 0,14 | 0,14 | 0    | 0 | 0 | 0 |
| XP_025081096.1 | uncharacterized protein LOC112556364 isoform X1                           | 41,668  | 121 | 129 | 132 | 0 | 0 | 0 | 2  | 2  | 2  | 0 | 0 | 0 | 0,17 | 0,17 | 0,17 | 0 | 0 | 0 |
| XP_025085233.1 | jupiter microtubule associated homolog 1-like                             | 15,8    | 117 | 122 | 115 | 0 | 0 | 0 | 3  | 3  | 3  | 0 | 0 | 0 | 0,86 | 0,86 | 0,86 | 0 | 0 | 0 |
| XP_025095496.1 | thioredoxin, mitochondrial-like                                           | 18,684  | 110 | 110 | 0   | 0 | 0 | 0 | 2  | 2  | 0  | 0 | 0 | 0 | 0,42 | 0,42 | 0    | 0 | 0 | 0 |
| XP_025080183.1 | C-type mannose receptor 2-like                                            | 39,263  | 110 | 0   | 108 | 0 | 0 | 0 | 2  | 0  | 2  | 0 | 0 | 0 | 0,19 | 0    | 0,19 | 0 | 0 | 0 |
| XP_025083875.1 | perlucin-like                                                             | 17,84   | 109 | 132 | 0   | 0 | 0 | 0 | 2  | 2  | 0  | 0 | 0 | 0 | 0,44 | 0,44 | 0    | 0 | 0 | 0 |
| XP_025108114.1 | sortilin-related receptor-like                                            | 33,215  | 0   | 136 | 137 | 0 | 0 | 0 | 0  | 2  | 2  | 0 | 0 | 0 | 0    | 0,22 | 0,22 | 0 | 0 | 0 |
| XP_025091465.1 | cathepsin B-like                                                          | 37,094  | 107 | 136 | 93  | 0 | 0 | 0 | 3  | 3  | 2  | 0 | 0 | 0 | 0,31 | 0,31 | 0,2  | 0 | 0 | 0 |
| XP_025077166.1 | ubiquilin-1-like isoform X1                                               | 61,23   | 106 | 107 | 0   | 0 | 0 | 0 | 2  | 3  | 0  | 0 | 0 | 0 | 0,12 | 0,18 | 0    | 0 | 0 | 0 |
| XP_025091949.1 | uncharacterized protein LOC112562719 isoform X1                           | 228,702 | 104 | 85  | 74  | 0 | 0 | 0 | 2  | 2  | 2  | 0 | 0 | 0 | 0,03 | 0,03 | 0,03 | 0 | 0 | 0 |
| XP_025110414.1 | UV excision repair protein RAD23 homolog B-like                           | 42,339  | 102 | 138 | 79  | 0 | 0 | 0 | 3  | 3  | 4  | 0 | 0 | 0 | 0,27 | 0,27 | 0,37 | 0 | 0 | 0 |
| XP_025115296.1 | nucleobindin-2-like isoform X1                                            | 62,651  | 101 | 0   | 49  | 0 | 0 | 0 | 2  | 0  | 2  | 0 | 0 | 0 | 0,11 | 0    | 0,11 | 0 | 0 | 0 |
| XP_025091078.1 | calcium-regulated heat stable protein 1-like                              | 16,322  | 99  | 96  | 68  | 0 | 0 | 0 | 3  | 2  | 2  | 0 | 0 | 0 | 0,83 | 0,49 | 0,49 | 0 | 0 | 0 |
| XP_025097352.1 | LQP: src substrate cortactin-like                                         | 61,172  | 97  | 148 | 142 | 0 | 0 | 0 | 2  | 3  | 3  | 0 | 0 | 0 | 0,12 | 0,18 | 0,18 | 0 | 0 | 0 |
| XP_025102573.1 | very low-density lipoprotein receptor-like                                | 17,855  | 97  | 78  | 90  | 0 | 0 | 0 | 2  | 2  | 2  | 0 | 0 | 0 | 0,44 | 0,74 | 0,74 | 0 | 0 | 0 |
| XP_025113971.1 | uncharacterized protein LOC112575996 isoform X2                           | 18,111  | 92  | 107 | 0   | 0 | 0 | 0 | 2  | 2  | 0  | 0 | 0 | 0 | 0,44 | 0,44 | 0    | 0 | 0 | 0 |
| XP_025088678.1 | uncharacterized protein LOC112560828                                      | 23,978  | 85  | 160 | 171 | 0 | 0 | 0 | 2  | 2  | 2  | 0 | 0 | 0 | 0,32 | 0,32 | 0,32 | 0 | 0 | 0 |
| XP_025094190.1 | death-associated protein 1-like                                           | 12,171  | 85  | 47  | 46  | 0 | 0 | 0 | 3  | 2  | 3  | 0 | 0 | 0 | 1,22 | 0,7  | 1,22 | 0 | 0 | 0 |
| XP_025106781.1 | voltage-dependent calcium channel subunit alpha-2/delta-2-like isoform X1 | 133,699 | 85  | 64  | 0   | 0 | 0 | 0 | 2  | 2  | 0  | 0 | 0 | 0 | 0,05 | 0,05 | 0    | 0 | 0 | 0 |
| XP_025096696.1 | insulin-like growth factor-binding protein-related protein 1              | 26,82   | 84  | 37  | 45  | 0 | 0 | 0 | 2  | 2  | 2  | 0 | 0 | 0 | 0,28 | 0,28 | 0,28 | 0 | 0 | 0 |



|                |                                                      |         |    |    |     |   |   |   |   |   |   |   |   |   |      |      |      |   |   |   |
|----------------|------------------------------------------------------|---------|----|----|-----|---|---|---|---|---|---|---|---|---|------|------|------|---|---|---|
| XP_025094826.1 | acyl-CoA-binding protein-like                        | 9,701   | 71 | 82 | 0   | 0 | 0 | 0 | 2 | 2 | 0 | 0 | 0 | 0 | 0,94 | 0,94 | 0    | 0 | 0 | 0 |
| XP_025082802.1 | formin-like protein 3                                | 26,939  | 70 | 0  | 53  | 0 | 0 | 0 | 2 | 0 | 2 | 0 | 0 | 0 | 0,28 | 0    | 0,28 | 0 | 0 | 0 |
| XP_025105588.1 | endoglucanase-like                                   | 21,807  | 67 | 58 | 78  | 0 | 0 | 0 | 2 | 2 | 3 | 0 | 0 | 0 | 0,58 | 0,58 | 0,84 | 0 | 0 | 0 |
| XP_025089735.1 | proteasomal ubiquitin receptor ADRM1-like isoform X1 | 45,778  | 65 | 94 | 89  | 0 | 0 | 0 | 2 | 2 | 2 | 0 | 0 | 0 | 0,16 | 0,16 | 0,16 | 0 | 0 | 0 |
| XP_025114839.1 | uncharacterized protein LOC112576500 isoform X8      | 158,195 | 53 | 76 | 78  | 0 | 0 | 0 | 3 | 4 | 4 | 0 | 0 | 0 | 0,07 | 0,09 | 0,09 | 0 | 0 | 0 |
| XP_025077341.1 | tubulin-specific chaperone A-like                    | 12,748  | 51 | 0  | 45  | 0 | 0 | 0 | 2 | 0 | 2 | 0 | 0 | 0 | 0,66 | 0    | 0,66 | 0 | 0 | 0 |
| XP_025079545.1 | uncharacterized protein LOC112555390                 | 35,749  | 50 | 56 | 57  | 0 | 0 | 0 | 2 | 2 | 2 | 0 | 0 | 0 | 0,21 | 0,21 | 0,21 | 0 | 0 | 0 |
| XP_025092033.1 | uncharacterized protein LOC112562770 isoform X1      | 68,866  | 46 | 61 | 69  | 0 | 0 | 0 | 3 | 2 | 3 | 0 | 0 | 0 | 0,16 | 0,1  | 0,16 | 0 | 0 | 0 |
| XP_025096197.1 | uncharacterized protein LOC112565114                 | 13,661  | 39 | 68 | 50  | 0 | 0 | 0 | 2 | 2 | 2 | 0 | 0 | 0 | 0,61 | 0,61 | 0,61 | 0 | 0 | 0 |
| XP_025082044.1 | calexctin-2-like                                     | 21,865  | 0  | 82 | 67  | 0 | 0 | 0 | 0 | 3 | 2 | 0 | 0 | 0 | 0    | 0,57 | 0,35 | 0 | 0 | 0 |
| XP_025108516.1 | uncharacterized protein LOC112572830                 | 35,046  | 0  | 80 | 131 | 0 | 0 | 0 | 0 | 2 | 3 | 0 | 0 | 0 | 0    | 0,21 | 0,33 | 0 | 0 | 0 |
