# Supplementary material for: Pomacea canaliculata Ampullar Proteome: A Nematode-Based Bio-Pesticide Induces Changes in Metabolic and Stress-Related Pathways
Source: MDPI journal article supplement (doi:10.3390/biology10101049), 2021-10-15
Supplement: s1 [file s1]

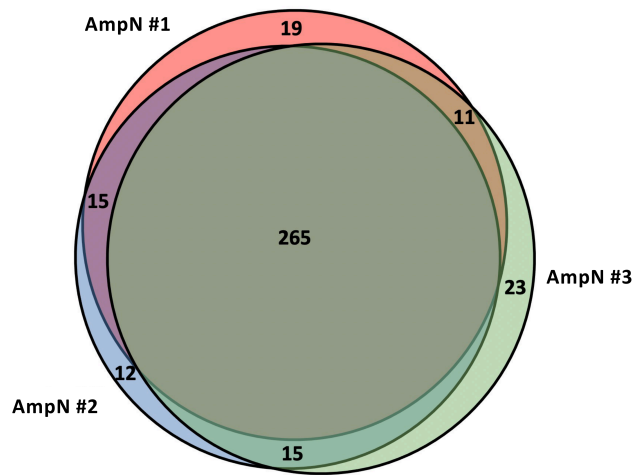

**Figure S1.** Venn diagram of total proteins identified in each of three biological replicates (#1, #2 and #3) of ampulla exposed to nematode (AmpN). The proteins identified in at least two biological replicates (306) were used for further analysis.
