# Supplementary material for: Pomacea canaliculata Ampullar Proteome: A Nematode-Based Bio-Pesticide Induces Changes in Metabolic and Stress-Related Pathways
Source: MDPI journal article supplement (doi:10.3390/biology10101049), 2021-10-15
Supplement: s1 [file s1]

**Table S3.** List of common proteins identified in AmpC and AmpN. A label-free quantitative proteomic analysis was applied. For each protein it has been calculated the p-value and log<sub>2</sub> Fold change (AmpN/AmpC).

| Accession      | Description                                                 | P-value  | log <sub>2</sub> Fold Change |
|----------------|-------------------------------------------------------------|----------|------------------------------|
| XP_025089564.1 | LQP: hemocyanin G-type, units Oda to Odg-like               | 3.11E-06 | 0.631516                     |
| XP_025089796.1 | hemocyanin G-type, units Oda to Odg-like                    | 0.000323 | 0.555688                     |
| XP_025106444.1 | filamin-A-like isoform X1                                   | 0.000299 | 1.419625                     |
| XP_025112424.1 | actin, adductor muscle                                      | 0.011005 | 0.83838                      |
| XP_025110090.1 | actin, cytoplasmic                                          | 0.006853 | 0.513847                     |
| XP_025110638.1 | LQP: myosin heavy chain, striated muscle-like               | 5.89E-06 | 5.289117                     |
| XP_025089549.1 | cartilage matrix protein-like                               | 0.329807 | 0.195573                     |
| XP_025102035.1 | 15-hydroxyprostaglandin dehydrogenase [NAD(+)]-like         | 0.015855 | 0.389144                     |
| XP_025078481.1 | murinoglobulin-1-like isoform X8                            | 0.046628 | 0.34875                      |
| XP_025086366.1 | paramyosin-like isoform X1                                  | 6.29E-07 | 3.498598                     |
| XP_025093885.1 | LQP: uncharacterized protein LOC112563776                   | 4.27E-05 | 1.148421                     |
| XP_025103230.1 | calponin-1-like                                             | 0.008385 | -0.55247                     |
| XP_025083091.1 | enolase-like                                                | 0.000142 | 0.558131                     |
| XP_025106551.1 | collagen alpha-3(VI) chain-like isoform X18                 | 0.00317  | 1.046923                     |
| XP_025106211.1 | glutamate receptor 1-like                                   | 8.88E-06 | 1.742724                     |
| XP_025082312.1 | glyceraldehyde-3-phosphate dehydrogenase-like isoform X1    | 0.010395 | 0.56158                      |
| XP_025104758.1 | malate dehydrogenase, cytoplasmic-like                      | 3.81E-05 | 2.592439                     |
| XP_025087209.1 | transgelin-2-like                                           | 0.006039 | 0.834937                     |
| XP_025114701.1 | peptidyl-prolyl cis-trans isomerase B-like                  | 0.027084 | 0.723567                     |
| XP_025087809.1 | vinculin-like isoform X1                                    | 0.000419 | 1.800653                     |
| XP_025099134.1 | LQP: arginine kinase-like                                   | 0.000265 | 1.510341                     |
| XP_025083839.1 | heat shock cognate 71 kDa protein                           | 3.9E-05  | 2.888477                     |
| XP_025099490.1 | heat shock protein 70 B2-like                               | 0.006393 | 1.295692                     |
| XP_025103379.1 | alpha-actinin, sarcomeric-like isoform X1                   | 0.000361 | 4.139306                     |
| XP_025113955.1 | glutathione S-transferase 1-like                            | 0.000842 | 1.553176                     |
| XP_025113405.1 | glutathione S-transferase S1-like                           | 8.63E-05 | 1.972678                     |
| XP_025098567.1 | myophilin-like                                              | 0.321925 | -0.33801                     |
| XP_025095804.1 | uncharacterized protein LOC112564910                        | 0.403734 | 0.20436                      |
| XP_025114751.1 | synaptic vesicle membrane protein VAT-1 homolog-like        | 0.009488 | 0.726411                     |
| XP_025104956.1 | LQP: spectrin beta chain-like                               | 0.000468 | 3.035385                     |
| XP_025090809.1 | LQP: elongation factor 1-alpha-like                         | 0.000708 | 3.831499                     |
| XP_025094704.1 | protein disulfide-isomerase-like isoform X1                 | 0.004507 | 1.359329                     |
| XP_025093079.1 | 14-3-3 protein epsilon-like isoform X1                      | 0.037068 | 1.464123                     |
| XP_025090294.1 | 14-3-3 protein beta/alpha-A-like                            | 0.005248 | 1.763492                     |
| XP_025080405.1 | calumenin-like isoform X2                                   | 0.001715 | -1.09339                     |
| XP_025078041.1 | LQP: collagen alpha-5(VI) chain-like                        | 0.418012 | 0.25486                      |
| XP_025106720.1 | LQP: transketolase-like                                     | 0.000397 | 2.571769                     |
| XP_025109080.1 | calreticulin-like                                           | 0.116147 | 0.145734                     |
| XP_025099080.1 | alpha-crystallin A chain-like                               | 0.026076 | -0.19405                     |
| XP_025096926.1 | protein lethal(2)essential for life-like                    | 0.002006 | -0.42869                     |
| XP_025077321.1 | LQP: thrombospondin type-1 domain-containing protein 4-like | 0.979517 | 0.002997                     |
| XP_025111140.1 | far upstream element-binding protein 3-like                 | 0.096432 | -0.3441                      |

|                |                                                               |          |          |
|----------------|---------------------------------------------------------------|----------|----------|
| XP_025110201.1 | LQP: uncharacterized protein LOC112573811                     | 5.36E-06 | 1.269061 |
| XP_025080024.1 | serine protease inhibitor 2.1-like isoform X1                 | 0.008812 | 0.846907 |
| XP_025080031.1 | serine protease inhibitor 2.1-like                            | 0.000502 | 0.958002 |
| XP_025079300.1 | myosin essential light chain, striated adductor muscle-like   | 0.731334 | 0.04562  |
| XP_025082558.1 | LQP: protein singed-like                                      | 0.022403 | 1.927912 |
| XP_025090599.1 | fructose-bisphosphate aldolase-like isoform X1                | 0.022681 | 1.050548 |
| XP_025098992.1 | superoxide dismutase [Cu-Zn]-like                             | 0.951428 | 0.008747 |
| XP_025083507.1 | uncharacterized protein LOC112557719                          | 0.237408 | -0.32136 |
| XP_025089044.1 | malate dehydrogenase, mitochondrial-like isoform X1           | 0.000113 | 1.817043 |
| XP_025086134.1 | hemicentin-2-like isoform X1                                  | 0.000508 | -0.95566 |
| XP_025097192.1 | NADP-dependent malic enzyme-like                              | 0.267131 | 0.214143 |
| XP_025084779.1 | LQP: twitchin-like                                            | 0.609592 | 0.119425 |
| XP_025108883.1 | peptidyl-prolyl cis-trans isomerase-like                      | 1.06E-06 | 1.797534 |
| XP_025113499.1 | PDZ and LIM domain protein 7-like isoform X1                  | 0.005315 | 0.707244 |
| XP_025089511.1 | collagen alpha-6(VI) chain-like                               | 0.000789 | 0.715515 |
| XP_025086357.1 | troponin T, skeletal muscle-like isoform X3                   | 0.022699 | 0.539799 |
| XP_025098387.1 | catalase-like isoform X1                                      | 0.010952 | 2.622116 |
| XP_025085843.1 | dihydropyrimidinase-like isoform X1                           | 0.000429 | 2.521828 |
| XP_025084336.1 | uncharacterized protein LOC112558220                          | 0.046419 | 0.144776 |
| XP_025107274.1 | LQP: glutathione S-transferase Mu 2-like                      | 0.000396 | 2.341715 |
| XP_025089430.1 | uncharacterized protein LOC112561269                          | 0.007239 | 0.772014 |
| XP_025107962.1 | uncharacterized protein LOC112572474                          | 0.003593 | -0.36236 |
| XP_025107262.1 | uncharacterized protein LOC112572003                          | 0.223464 | 0.986147 |
| XP_025080714.1 | 2hiamine pyrophosphokinase 1-like isoform X1                  | 0.475275 | 0.136653 |
| XP_025092669.1 | cartilage matrix protein-like                                 | 0.017131 | -0.36215 |
| XP_025087031.1 | thymosin beta-like isoform X2                                 | 0.004896 | -1.05945 |
| XP_025078405.1 | microtubule-associated protein futsch-like isoform X1         | 0.061955 | -1.24907 |
| XP_025078538.1 | voltage-dependent anion-selective channel protein 2-like      | 0.012484 | 2.206812 |
| XP_025100514.1 | kinesin-like protein K39                                      | 0.003484 | -1.03774 |
| XP_025082853.1 | uncharacterized protein LOC112557300                          | 0.020629 | -1.55671 |
| XP_025104157.1 | LQP: titin-like                                               | 0.000772 | -1.64498 |
| XP_025112526.1 | rho GDP-dissociation inhibitor 1-like                         | 0.435723 | 0.237909 |
| XP_025087544.1 | small heat shock protein p36-like                             | 3.5E-06  | -2.04098 |
| XP_025099800.1 | radixin-like                                                  | 0.000492 | 1.316749 |
| XP_025085606.1 | uncharacterized protein LOC112559006                          | 9.59E-05 | -1.6973  |
| XP_025091980.1 | reticulon-1-like isoform X1                                   | 0.031882 | 0.663382 |
| XP_025089524.1 | collagen alpha-6(VI) chain-like                               | 0.000468 | 1.516933 |
| XP_025112685.1 | LIM domain-containing protein WLIM2b-like                     | 0.198805 | -1.01772 |
| XP_025092049.1 | actin-depolymerizing factor 2-like                            | 0.190762 | -0.30598 |
| XP_025081499.1 | eukaryotic translation initiation factor 5A-1-like isoform X1 | 0.003639 | -0.95098 |
| XP_025094027.1 | uncharacterized protein LOC112563852 isoform X1               | 0.019297 | 0.468742 |
| XP_025105842.1 | enolase-phosphatase E1-like                                   | 0.202763 | 0.465853 |
| XP_025096983.1 | myophilin-like                                                | 0.370785 | 0.495811 |
| XP_025092675.1 | 60S acidic ribosomal protein P2-like                          | 0.006832 | 2.005876 |
| XP_025110989.1 | xylose isomerase-like                                         | 0.01412  | 1.833387 |
| XP_025082709.1 | SH3 domain-binding glutamic acid-rich-like protein 3          | 0.01434  | -0.79073 |
| XP_025087966.1 | copper transport protein ATOX1-like                           | 0.00032  | -0.77194 |
| XP_025107348.1 | superoxide dismutase [Cu-Zn]-like                             | 0.048028 | 0.14353  |

|                          |                                                                |          |          |
|--------------------------|----------------------------------------------------------------|----------|----------|
| XP_025085667.1           | lysosomal aspartic protease-like                               | 0.024059 | 2.32086  |
| XP_025104087.1           | titin-like isoform X1                                          | 0.000689 | -2.06979 |
| XP_025078628.1           | LQP: neurofilament medium polypeptide-like                     | 0.025379 | 1.346143 |
| XP_025106788.1           | uncharacterized protein LOC112571747                           | 0.726597 | 0.197216 |
| XP_025109789.1           | transforming growth factor-beta-induced protein ig-h3-like     | 0.033214 | -1.188   |
| XP_025096878.1           | uncharacterized protein LOC112565575 isoform X1                | 0.002002 | -1.32377 |
| XP_025082706.1           | protein/nucleic acid deglycase DJ-1-like                       | 0.002122 | 2.024145 |
| XP_025089277.1           | cofilin-like                                                   | 0.079226 | 0.685441 |
| XP_025098601.1           | troponin C-like isoform X1                                     | 0.002188 | -1.41944 |
| XP_025106684.1           | uncharacterized protein LOC112571691                           | 0.13513  | -0.34197 |
| XP_025090849.1           | vegetative incompatibility protein HET-E-1-like                | 0.001314 | 1.324563 |
| XP_025104082.1           | barrier-to-autointegration factor-like                         | 0.047906 | 0.14353  |
| XP_025093398.1           | actin-interacting protein 1-like                               | 0.003751 | 1.623441 |
| XP_025095112.1           | elongation factor 1-beta-like                                  | 0.027983 | 1.365221 |
| XP_025082954.1           | uncharacterized protein LOC112557363                           | 0.356392 | -1.03829 |
| XP_025077458.1           | LQP: fibrillin-2-like                                          | 0.386627 | 3.635899 |
| XP_025081260.1           | collagen alpha-1(I) chain-like                                 | 0.003941 | -1.51975 |
| XP_025099638.1           | ganglioside GM2 activator-like                                 | 0.03827  | 0.151989 |
| XP_025081261.1           | collagen alpha-1(I) chain-like isoform X1                      | 0.855228 | -0.05926 |
| XP_025104800.1           | uncharacterized protein LOC112570531                           | 0.010964 | -0.85766 |
| XP_025104799.1           | uncharacterized protein LOC112570529                           | 0.001003 | -1.72428 |
| XP_025113673.1           | fatty acid-binding protein, liver-like                         | 0.132365 | -0.65129 |
| XP_025084055.1           | uncharacterized protein LOC112558076                           | 0.064938 | 0.669395 |
| XP_025090775.1           | LQP: tensin-1-like                                             | 5.75E-06 | -1.77371 |
| XP_025083419.1           | small cardioactive peptides-like isoform X1                    | 0.002106 | -1.29382 |
| XP_025083634.1           | thioredoxin-1-like                                             | 0.034374 | -1.58664 |
| XP_025094101.1           | FK506-binding protein 2-like                                   | 0.002086 | -1.02828 |
| XP_025111371.1           | LQP: 40S ribosomal protein S12-like                            | 6.42E-05 | -1.38759 |
| XP_025112868.1           | uncharacterized protein LOC112575321 isoform X1                | 0.020812 | 1.695959 |
| XP_025092572.1           | von Willebrand factor D and EGF domain-containing protein-like | 0.790373 | 0.251846 |
| XP_025109048.1           | peroxiredoxin-like isoform X1                                  | 0.893765 | -0.05183 |
| XP_025114384.1           | PDZ and LIM domain protein 3-like isoform X1                   | 0.000647 | -1.60308 |
| XP_025077943.1           | LQP: cartilage matrix protein-like                             | 0.127128 | -1.12619 |
| XP_025105802.1           | lactoylglutathione lyase-like isoform X1                       | 0.218581 | 0.426436 |
| XP_025104144.1           | mammalian ependymin-related protein 1-like                     | 0.000133 | -1.04629 |
| XP_025076135.1           | fructose-1,6-bisphosphatase 1-like                             | 0.234194 | 1.070642 |
| XP_025082862.1           | PDZ and LIM domain protein 5-like                              | 0.000199 | -2.36176 |
| XP_025082818.1           | triosephosphate isomerase-like                                 | 0.137427 | 1.041259 |
| XP_025116005.1           | uncharacterized protein LOC112577210 isoform X1                | 0.055437 | -0.59311 |
| XP_025089133.1           | fatty acid-binding protein, adipocyte-like                     | 0.000652 | -0.61427 |
| XP_025087122.1           | myotrophin-like                                                | 0.029611 | -0.86316 |
| XP_025101599.1           | phospholipid transfer protein C2CD2L-like                      | 0.133925 | -0.96324 |
| XP_025078843.1           | glycogenin-1-like isoform X1                                   | 0.00642  | -1.0357  |
| XP_025082010.1           | myosin-2 essential light chain-like                            | 0.035777 | -3.49412 |
| LQP= low quality protein |                                                                |          |          |
