# Supplementary material for: Pomacea canaliculata Ampullar Proteome: A Nematode-Based Bio-Pesticide Induces Changes in Metabolic and Stress-Related Pathways
Source: Biology (Basel). 2021 Oct 15;10(10):1049. doi: 10.3390/biology10101049 (PMC8533556; doi:10.3390/biology10101049)
Supplement: Supplementary file 1 [file biology-10-01049-s001.zip]

Archive with 8 entries (8 files):
- Fig. S1.pdf
- __MACOSX/._Fig. S1.pdf
- Table S1.pdf
- __MACOSX/._Table S1.pdf
- Table S2.pdf
- __MACOSX/._Table S2.pdf
- Table S3.pdf
- __MACOSX/._Table S3.pdf
